# Supplementary material
Source: publisher figshare collection journal article supplement (https://acs.figshare.com/ndownloader/files/4523911)
Supplement: Supplementary file 1 [file 4523911]

data_global


_publ_contact_author_name         'Martin Lutz'
_publ_contact_author_address
; Bijvoet Center for Biomolecular Research
  Crystal and Structural Chemistry
  Utrecht University
  Padualaan 8
  3584 CH Utrecht
  The Netherlands
;
_publ_contact_author_email        'm.lutz@uu.nl'
_publ_contact_author_fax          '[+31] 30 2533940'
_publ_contact_author_phone        '[+31] 30 2533902'

_publ_section_title
;
Reaction of Iridium Phosphinidenes with Isocyanides
;

loop_
_publ_author_name
_publ_author_address
  'Aktas, Halil'
;  Department of Chemistry and Pharmaceutical Sciences
   Vrije Universiteit Amsterdam
   De Boelelaan 1083
   1081 HV Amsterdam
   The Netherlands
;
  'Mohamud, Abdul K.'
;  Department of Chemistry and Pharmaceutical Sciences
   Vrije Universiteit Amsterdam
   De Boelelaan 1083
   1081 HV Amsterdam
   The Netherlands
;
  'Mulder, Jos'
;  Department of Chemistry and Pharmaceutical Sciences
   Vrije Universiteit Amsterdam
   De Boelelaan 1083
   1081 HV Amsterdam
   The Netherlands
;
  'Slootweg, J. Chris'
;  Department of Chemistry and Pharmaceutical Sciences
   Vrije Universiteit Amsterdam
   De Boelelaan 1083
   1081 HV Amsterdam
   The Netherlands
;
  'Schakel, Marius'
;  Department of Chemistry and Pharmaceutical Sciences
   Vrije Universiteit Amsterdam
   De Boelelaan 1083
   1081 HV Amsterdam
   The Netherlands
;
  'Ehlers, Andreas W.'
;  Department of Chemistry and Pharmaceutical Sciences
   Vrije Universiteit Amsterdam
   De Boelelaan 1083
   1081 HV Amsterdam
   The Netherlands
;
  'Lutz, Martin'
;  Bijvoet Center for Biomolecular Research
   Crystal and Structural Chemistry
   Utrecht University
   Padualaan 8
   3584 CH Utrecht
   The Netherlands
;
  'Spek, Anthony L.'
;  Bijvoet Center for Biomolecular Research
   Crystal and Structural Chemistry
   Utrecht University
   Padualaan 8
   3584 CH Utrecht
   The Netherlands
;
  'Lammertsma, Koop'
;  Department of Chemistry and Pharmaceutical Sciences
   Vrije Universiteit Amsterdam
   De Boelelaan 1083
   1081 HV Amsterdam
   The Netherlands
;


 
data_s3790a 
 
_audit_creation_method            SHELXL-97 
_chemical_name_systematic 
; 
 ? 
; 
_chemical_name_common             ? 
_chemical_melting_point           ? 
_chemical_formula_moiety
 'C46 H62 Ir N2 P'
_chemical_formula_sum 
 'C46 H62 Ir N2 P' 
_chemical_formula_weight          866.15 
 
loop_ 
 _atom_type_symbol 
 _atom_type_description 
 _atom_type_scat_dispersion_real 
 _atom_type_scat_dispersion_imag 
 _atom_type_scat_source 
 'C'  'C'   0.0033   0.0016 
 'International Tables Vol C Tables 4.2.6.8 and 6.1.1.4' 
 'H'  'H'   0.0000   0.0000 
 'International Tables Vol C Tables 4.2.6.8 and 6.1.1.4' 
 'Ir'  'Ir'  -1.4442   7.9887 
 'International Tables Vol C Tables 4.2.6.8 and 6.1.1.4' 
 'N'  'N'   0.0061   0.0033 
 'International Tables Vol C Tables 4.2.6.8 and 6.1.1.4' 
 'P'  'P'   0.1023   0.0942 
 'International Tables Vol C Tables 4.2.6.8 and 6.1.1.4' 
 
_symmetry_cell_setting            monoclinic
_symmetry_space_group_name_H-M    'P 21/c'
_symmetry_space_group_name_Hall   '-P 2ybc'
 
loop_ 
 _symmetry_equiv_pos_as_xyz 
 'x, y, z' 
 '-x, y+1/2, -z+1/2' 
 '-x, -y, -z' 
 'x, -y-1/2, z-1/2' 
 
_cell_length_a                    14.3239(4) 
_cell_length_b                    16.0921(4) 
_cell_length_c                    21.5079(7) 
_cell_angle_alpha                 90.00 
_cell_angle_beta                  122.067(1) 
_cell_angle_gamma                 90.00 
_cell_volume                      4201.2(2) 
_cell_formula_units_Z             4 
_cell_measurement_temperature     150(2) 
_cell_measurement_reflns_used     28899
_cell_measurement_theta_min       1.69
_cell_measurement_theta_max       27.50
 
_exptl_crystal_description        block
_exptl_crystal_colour             yellow
_exptl_crystal_size_max           0.24
_exptl_crystal_size_mid           0.21
_exptl_crystal_size_min           0.10
_exptl_crystal_density_meas       ? 
_exptl_crystal_density_diffrn     1.369 
_exptl_crystal_density_method     'not measured' 
_exptl_crystal_F_000              1776 
_exptl_absorpt_coefficient_mu     3.248 
_exptl_absorpt_correction_type    'multi-scan'
_exptl_absorpt_correction_T_min   0.45
_exptl_absorpt_correction_T_max   0.72
_exptl_absorpt_process_details    ? 
 
_exptl_special_details 
; 
 ? 
; 
 
_diffrn_ambient_temperature       150(2) 
_diffrn_radiation_wavelength      0.71073 
_diffrn_radiation_type            MoK\a 
_diffrn_radiation_source          'rotating anode' 
_diffrn_radiation_monochromator   graphite 
_diffrn_measurement_device_type   'Nonius KappaCCD'
_diffrn_measurement_method        '\f and \w scans'
_diffrn_detector_area_resol_mean  ? 
_diffrn_standards_number          ? 
_diffrn_standards_interval_count  ? 
_diffrn_standards_interval_time   ? 
_diffrn_standards_decay_%         ? 
_diffrn_reflns_number             69676 
_diffrn_reflns_av_R_equivalents   0.0335 
_diffrn_reflns_av_sigmaI/netI     0.0238 
_diffrn_reflns_limit_h_min        -18 
_diffrn_reflns_limit_h_max        18 
_diffrn_reflns_limit_k_min        -20 
_diffrn_reflns_limit_k_max        20 
_diffrn_reflns_limit_l_min        -27 
_diffrn_reflns_limit_l_max        27 
_diffrn_reflns_theta_min          1.68 
_diffrn_reflns_theta_max          27.52 
_reflns_number_total              9645 
_reflns_number_gt                 7990 
_reflns_threshold_expression      'I>2\s(I)'
 
_computing_data_collection        'Nonius COLLECT'
_computing_cell_refinement        'Peakref'
_computing_data_reduction         'EvalCCD, Sadabs'
_computing_structure_solution     'DIRDIF-99 (Beurskens et al., 1999)' 
_computing_structure_refinement   'SHELXL-97 (Sheldrick, 1997)' 
_computing_molecular_graphics     ? 
_computing_publication_material   ? 
 
_refine_special_details 
; 
 Refinement of F^2^ against ALL reflections.  The weighted R-factor wR and 
 goodness of fit S are based on F^2^, conventional R-factors R are based 
 on F, with F set to zero for negative F^2^. The threshold expression of 
 F^2^ > 2sigma(F^2^) is used only for calculating R-factors(gt) etc. and is 
 not relevant to the choice of reflections for refinement.  R-factors based 
 on F^2^ are statistically about twice as large as those based on F, and R- 
 factors based on ALL data will be even larger. 
; 
 
_refine_ls_structure_factor_coef  Fsqd  
_refine_ls_matrix_type            full 
_refine_ls_weighting_scheme       calc  
_refine_ls_weighting_details 
 'calc w=1/[\s^2^(Fo^2^)+(0.0147P)^2^+2.2772P] where P=(Fo^2^+2Fc^2^)/3' 
_atom_sites_solution_primary      heavy 
_atom_sites_solution_secondary    difmap 
_atom_sites_solution_hydrogens    difmap
_refine_ls_hydrogen_treatment     constr
_refine_ls_extinction_method      none 
_refine_ls_extinction_coef        ? 
_refine_ls_number_reflns          9645 
_refine_ls_number_parameters      469 
_refine_ls_number_restraints      0 
_refine_ls_R_factor_all           0.0313 
_refine_ls_R_factor_gt            0.0187 
_refine_ls_wR_factor_ref          0.0391 
_refine_ls_wR_factor_gt           0.0358 
_refine_ls_goodness_of_fit_ref    1.043 
_refine_ls_restrained_S_all       1.043 
_refine_ls_shift/su_max           0.015 
_refine_ls_shift/su_mean          0.000 
 
loop_ 
 _atom_site_label 
 _atom_site_type_symbol 
 _atom_site_fract_x 
 _atom_site_fract_y 
 _atom_site_fract_z 
 _atom_site_U_iso_or_equiv 
 _atom_site_adp_type 
 _atom_site_occupancy 
 _atom_site_symmetry_multiplicity 
 _atom_site_calc_flag 
 _atom_site_refinement_flags 
 _atom_site_disorder_assembly 
 _atom_site_disorder_group 
Ir1 Ir 0.085958(6) 0.189159(5) 0.144973(4) 0.01566(3) Uani 1 1 d . . . 
P1 P 0.16614(4) 0.05802(3) 0.14283(3) 0.01661(10) Uani 1 1 d . . . 
N1 N 0.04940(13) 0.03012(11) 0.21465(9) 0.0213(4) Uani 1 1 d . . . 
N2 N 0.28894(14) 0.24983(11) 0.28863(10) 0.0278(4) Uani 1 1 d . . . 
C1 C 0.31826(15) 0.05491(12) 0.21203(10) 0.0163(4) Uani 1 1 d . . . 
C2 C 0.36417(16) 0.00680(12) 0.27715(11) 0.0190(4) Uani 1 1 d . . . 
C3 C 0.46978(16) 0.02796(13) 0.33616(11) 0.0227(4) Uani 1 1 d . . . 
H3 H 0.4977 -0.0011 0.3811 0.027 Uiso 1 1 calc R . . 
C4 C 0.53547(16) 0.08834(13) 0.33277(11) 0.0211(4) Uani 1 1 d . . . 
C5 C 0.49586(16) 0.12304(13) 0.26377(11) 0.0207(4) Uani 1 1 d . . . 
H5 H 0.5422 0.1604 0.2581 0.025 Uiso 1 1 calc R . . 
C6 C 0.39155(15) 0.10591(12) 0.20235(11) 0.0182(4) Uani 1 1 d . . . 
C7 C 0.31440(16) -0.07305(13) 0.28939(11) 0.0237(5) Uani 1 1 d . . . 
C8 C 0.28515(19) -0.05786(15) 0.34745(12) 0.0330(5) Uani 1 1 d . . . 
H8A H 0.2280 -0.0150 0.3300 0.049 Uiso 1 1 calc R . . 
H8B H 0.3509 -0.0393 0.3932 0.049 Uiso 1 1 calc R . . 
H8C H 0.2578 -0.1095 0.3563 0.049 Uiso 1 1 calc R . . 
C9 C 0.4033(2) -0.14229(15) 0.31784(15) 0.0404(6) Uani 1 1 d . . . 
H9A H 0.3735 -0.1937 0.3250 0.061 Uiso 1 1 calc R . . 
H9B H 0.4682 -0.1250 0.3646 0.061 Uiso 1 1 calc R . . 
H9C H 0.4243 -0.1519 0.2819 0.061 Uiso 1 1 calc R . . 
C10 C 0.21476(18) -0.11017(13) 0.21972(12) 0.0272(5) Uani 1 1 d . . . 
H10A H 0.1992 -0.1658 0.2306 0.041 Uiso 1 1 calc R . . 
H10B H 0.2312 -0.1139 0.1810 0.041 Uiso 1 1 calc R . . 
H10C H 0.1503 -0.0745 0.2032 0.041 Uiso 1 1 calc R . . 
C11 C 0.65193(17) 0.10758(14) 0.39818(12) 0.0263(5) Uani 1 1 d . . . 
C12 C 0.65846(19) 0.09822(18) 0.47139(12) 0.0406(6) Uani 1 1 d . . . 
H12A H 0.6053 0.1358 0.4722 0.061 Uiso 1 1 calc R . . 
H12B H 0.7330 0.1121 0.5119 0.061 Uiso 1 1 calc R . . 
H12C H 0.6413 0.0407 0.4768 0.061 Uiso 1 1 calc R . . 
C13 C 0.73314(18) 0.04526(17) 0.39806(14) 0.0417(7) Uani 1 1 d . . . 
H13A H 0.7120 -0.0113 0.4025 0.063 Uiso 1 1 calc R . . 
H13B H 0.8077 0.0570 0.4395 0.063 Uiso 1 1 calc R . . 
H13C H 0.7314 0.0504 0.3521 0.063 Uiso 1 1 calc R . . 
C14 C 0.6877(2) 0.19606(16) 0.39411(14) 0.0464(7) Uani 1 1 d . . . 
H14A H 0.6940 0.2012 0.3511 0.070 Uiso 1 1 calc R . . 
H14B H 0.7592 0.2079 0.4386 0.070 Uiso 1 1 calc R . . 
H14C H 0.6328 0.2357 0.3901 0.070 Uiso 1 1 calc R . . 
C15 C 0.36930(17) 0.14038(13) 0.12796(11) 0.0223(5) Uani 1 1 d . . . 
C16 C 0.28552(18) 0.08864(16) 0.06152(12) 0.0339(6) Uani 1 1 d . . . 
H16A H 0.2114 0.0986 0.0517 0.051 Uiso 1 1 calc R . . 
H16B H 0.3036 0.0295 0.0719 0.051 Uiso 1 1 calc R . . 
H16C H 0.2881 0.1047 0.0185 0.051 Uiso 1 1 calc R . . 
C17 C 0.47634(17) 0.13724(15) 0.12687(12) 0.0288(5) Uani 1 1 d . . . 
H17A H 0.4592 0.1494 0.0772 0.043 Uiso 1 1 calc R . . 
H17B H 0.5091 0.0817 0.1416 0.043 Uiso 1 1 calc R . . 
H17C H 0.5285 0.1786 0.1611 0.043 Uiso 1 1 calc R . . 
C18 C 0.3313(2) 0.23114(15) 0.11705(14) 0.0367(6) Uani 1 1 d . . . 
H18A H 0.3889 0.2652 0.1567 0.055 Uiso 1 1 calc R . . 
H18B H 0.2636 0.2351 0.1177 0.055 Uiso 1 1 calc R . . 
H18C H 0.3172 0.2512 0.0698 0.055 Uiso 1 1 calc R . . 
C19 C 0.09387(15) 0.07569(12) 0.18944(10) 0.0173(4) Uani 1 1 d . . . 
C20 C -0.03645(16) 0.05430(13) 0.22562(11) 0.0223(4) Uani 1 1 d . . . 
C21 C -0.13470(17) 0.00848(14) 0.18509(12) 0.0278(5) Uani 1 1 d . . . 
C22 C -0.22403(18) 0.02993(17) 0.19104(13) 0.0381(6) Uani 1 1 d . . . 
H22 H -0.2924 0.0021 0.1616 0.046 Uiso 1 1 calc R . . 
C23 C -0.2143(2) 0.09093(18) 0.23912(15) 0.0445(7) Uani 1 1 d . . . 
H23 H -0.2762 0.1056 0.2420 0.053 Uiso 1 1 calc R . . 
C24 C -0.1147(2) 0.13070(17) 0.28311(14) 0.0376(6) Uani 1 1 d . . . 
H24 H -0.1076 0.1702 0.3182 0.045 Uiso 1 1 calc R . . 
C25 C -0.02430(18) 0.11397(14) 0.27690(12) 0.0282(5) Uani 1 1 d . . . 
C26 C 0.0834(2) 0.15843(17) 0.32571(14) 0.0403(6) Uani 1 1 d . . . 
H26A H 0.0905 0.2043 0.2985 0.060 Uiso 1 1 calc R . . 
H26B H 0.1445 0.1194 0.3416 0.060 Uiso 1 1 calc R . . 
H26C H 0.0851 0.1805 0.3688 0.060 Uiso 1 1 calc R . . 
C27 C -0.1423(2) -0.06334(16) 0.13787(13) 0.0396(6) Uani 1 1 d . . . 
H27A H -0.2166 -0.0870 0.1131 0.059 Uiso 1 1 calc R . . 
H27B H -0.0885 -0.1060 0.1686 0.059 Uiso 1 1 calc R . . 
H27C H -0.1266 -0.0439 0.1011 0.059 Uiso 1 1 calc R . . 
C28 C -0.01164(16) 0.22325(13) 0.02174(11) 0.0222(4) Uani 1 1 d . . . 
C29 C 0.02839(16) 0.29845(13) 0.06136(12) 0.0252(5) Uani 1 1 d . . . 
C30 C -0.01705(16) 0.30683(13) 0.10714(11) 0.0238(4) Uani 1 1 d . . . 
C31 C -0.08780(15) 0.23786(12) 0.09377(11) 0.0210(5) Uani 1 1 d . . . 
C32 C -0.08118(15) 0.18404(12) 0.04294(10) 0.0198(4) Uani 1 1 d . . . 
C33 C 0.00639(19) 0.19073(15) -0.03653(12) 0.0327(5) Uani 1 1 d . . . 
H33A H -0.0544 0.2086 -0.0849 0.049 Uiso 1 1 calc R . . 
H33B H 0.0093 0.1299 -0.0345 0.049 Uiso 1 1 calc R . . 
H33C H 0.0760 0.2125 -0.0282 0.049 Uiso 1 1 calc R . . 
C34 C 0.09373(19) 0.36442(15) 0.05105(14) 0.0392(6) Uani 1 1 d . . . 
H34A H 0.1367 0.3387 0.0328 0.059 Uiso 1 1 calc R . . 
H34B H 0.1436 0.3917 0.0981 0.059 Uiso 1 1 calc R . . 
H34C H 0.0433 0.4057 0.0155 0.059 Uiso 1 1 calc R . . 
C35 C -0.0022(2) 0.38150(14) 0.15384(14) 0.0380(6) Uani 1 1 d . . . 
H35A H -0.0537 0.4253 0.1230 0.057 Uiso 1 1 calc R . . 
H35B H 0.0735 0.4021 0.1769 0.057 Uiso 1 1 calc R . . 
H35C H -0.0167 0.3657 0.1919 0.057 Uiso 1 1 calc R . . 
C36 C -0.16537(17) 0.22907(15) 0.12022(12) 0.0283(5) Uani 1 1 d . . . 
H36A H -0.1325 0.2545 0.1689 0.042 Uiso 1 1 calc R . . 
H36B H -0.1792 0.1700 0.1232 0.042 Uiso 1 1 calc R . . 
H36C H -0.2350 0.2570 0.0859 0.042 Uiso 1 1 calc R . . 
C37 C -0.14797(17) 0.10657(13) 0.00845(12) 0.0269(5) Uani 1 1 d . . . 
H37A H -0.2144 0.1206 -0.0387 0.040 Uiso 1 1 calc R . . 
H37B H -0.1691 0.0824 0.0410 0.040 Uiso 1 1 calc R . . 
H37C H -0.1039 0.0663 0.0006 0.040 Uiso 1 1 calc R . . 
C38 C 0.21320(16) 0.22521(13) 0.23376(11) 0.0201(4) Uani 1 1 d . . . 
C39 C 0.38105(17) 0.28809(14) 0.34813(12) 0.0275(5) Uani 1 1 d . . . 
C40 C 0.42453(17) 0.25449(16) 0.41838(13) 0.0332(6) Uani 1 1 d . . . 
C41 C 0.51529(19) 0.29498(19) 0.47651(14) 0.0452(7) Uani 1 1 d . . . 
H41 H 0.5475 0.2735 0.5248 0.054 Uiso 1 1 calc R . . 
C42 C 0.5588(2) 0.36499(19) 0.46536(17) 0.0571(9) Uani 1 1 d . . . 
H42 H 0.6194 0.3923 0.5059 0.069 Uiso 1 1 calc R . . 
C43 C 0.5150(2) 0.39591(16) 0.39561(19) 0.0532(8) Uani 1 1 d . . . 
H43 H 0.5471 0.4439 0.3887 0.064 Uiso 1 1 calc R . . 
C44 C 0.42484(19) 0.35882(15) 0.33478(14) 0.0356(6) Uani 1 1 d . . . 
C45 C 0.3757(2) 0.39331(17) 0.25906(16) 0.0490(7) Uani 1 1 d . . . 
H45A H 0.3013 0.4139 0.2414 0.074 Uiso 1 1 calc R . . 
H45B H 0.3721 0.3496 0.2262 0.074 Uiso 1 1 calc R . . 
H45C H 0.4216 0.4391 0.2600 0.074 Uiso 1 1 calc R . . 
C46 C 0.3766(2) 0.17825(19) 0.43102(14) 0.0485(7) Uani 1 1 d . . . 
H46A H 0.3077 0.1927 0.4278 0.073 Uiso 1 1 calc R . . 
H46B H 0.4290 0.1557 0.4798 0.073 Uiso 1 1 calc R . . 
H46C H 0.3619 0.1365 0.3937 0.073 Uiso 1 1 calc R . . 
 
loop_ 
 _atom_site_aniso_label 
 _atom_site_aniso_U_11 
 _atom_site_aniso_U_22 
 _atom_site_aniso_U_33 
 _atom_site_aniso_U_23 
 _atom_site_aniso_U_13 
 _atom_site_aniso_U_12 
Ir1 0.01154(4) 0.01521(4) 0.01510(4) -0.00029(3) 0.00360(3) -0.00081(3) 
P1 0.0137(2) 0.0179(3) 0.0158(2) -0.0012(2) 0.0062(2) -0.0012(2) 
N1 0.0182(9) 0.0229(9) 0.0223(9) 0.0017(7) 0.0104(8) -0.0002(7) 
N2 0.0198(9) 0.0294(11) 0.0239(10) -0.0075(8) 0.0046(8) -0.0007(8) 
C1 0.0146(9) 0.0160(10) 0.0170(10) -0.0040(8) 0.0075(8) -0.0005(8) 
C2 0.0180(10) 0.0190(11) 0.0204(11) 0.0002(8) 0.0105(9) 0.0019(8) 
C3 0.0217(10) 0.0247(11) 0.0168(10) 0.0029(8) 0.0070(9) 0.0046(9) 
C4 0.0152(10) 0.0229(11) 0.0205(11) -0.0049(8) 0.0063(8) 0.0022(8) 
C5 0.0163(10) 0.0213(11) 0.0247(11) -0.0056(9) 0.0109(9) -0.0044(8) 
C6 0.0165(10) 0.0178(10) 0.0196(10) -0.0028(8) 0.0092(8) 0.0007(8) 
C7 0.0216(10) 0.0202(11) 0.0248(11) 0.0060(9) 0.0093(9) 0.0024(9) 
C8 0.0340(13) 0.0355(14) 0.0275(12) 0.0069(10) 0.0150(11) -0.0047(11) 
C9 0.0327(13) 0.0264(13) 0.0494(17) 0.0101(12) 0.0132(12) 0.0056(11) 
C10 0.0301(12) 0.0157(11) 0.0323(13) 0.0028(9) 0.0143(10) -0.0024(9) 
C11 0.0171(10) 0.0334(13) 0.0212(11) -0.0084(9) 0.0053(9) 0.0002(9) 
C12 0.0242(12) 0.0659(18) 0.0209(12) -0.0134(12) 0.0047(10) -0.0030(12) 
C13 0.0191(11) 0.0594(18) 0.0352(14) -0.0118(12) 0.0067(10) 0.0084(11) 
C14 0.0310(13) 0.0435(16) 0.0369(15) -0.0097(12) -0.0007(11) -0.0157(12) 
C15 0.0213(10) 0.0269(12) 0.0205(11) 0.0000(9) 0.0123(9) -0.0023(9) 
C16 0.0267(12) 0.0565(17) 0.0205(12) -0.0040(11) 0.0139(10) -0.0109(11) 
C17 0.0259(11) 0.0362(13) 0.0296(13) -0.0039(10) 0.0182(10) -0.0083(10) 
C18 0.0409(14) 0.0334(14) 0.0451(16) 0.0143(12) 0.0291(13) 0.0056(11) 
C19 0.0118(9) 0.0180(10) 0.0151(10) -0.0010(8) 0.0024(8) -0.0001(8) 
C20 0.0193(10) 0.0259(12) 0.0221(11) 0.0084(9) 0.0114(9) 0.0024(9) 
C21 0.0229(11) 0.0344(13) 0.0232(12) 0.0080(10) 0.0103(10) -0.0043(10) 
C22 0.0191(11) 0.0592(17) 0.0324(14) 0.0103(12) 0.0112(11) -0.0056(11) 
C23 0.0283(13) 0.071(2) 0.0458(16) 0.0139(14) 0.0273(13) 0.0105(13) 
C24 0.0369(14) 0.0473(16) 0.0367(14) 0.0022(12) 0.0250(12) 0.0066(12) 
C25 0.0244(11) 0.0347(13) 0.0273(12) 0.0028(10) 0.0150(10) 0.0030(10) 
C26 0.0359(14) 0.0478(16) 0.0398(15) -0.0169(12) 0.0218(12) -0.0079(12) 
C27 0.0419(14) 0.0429(15) 0.0295(13) -0.0042(12) 0.0159(12) -0.0183(12) 
C28 0.0171(10) 0.0235(11) 0.0178(11) 0.0079(8) 0.0037(8) 0.0032(8) 
C29 0.0161(10) 0.0215(12) 0.0262(11) 0.0071(9) 0.0033(9) 0.0006(8) 
C30 0.0163(9) 0.0171(10) 0.0259(11) 0.0019(9) 0.0030(8) 0.0044(9) 
C31 0.0135(9) 0.0201(11) 0.0210(11) 0.0035(9) 0.0033(8) 0.0049(8) 
C32 0.0122(9) 0.0205(10) 0.0170(10) 0.0029(9) 0.0013(8) 0.0015(8) 
C33 0.0300(12) 0.0442(14) 0.0208(11) 0.0074(11) 0.0114(10) 0.0023(11) 
C34 0.0292(13) 0.0263(13) 0.0502(16) 0.0153(11) 0.0129(12) -0.0022(10) 
C35 0.0331(13) 0.0224(12) 0.0421(15) -0.0073(11) 0.0089(12) 0.0012(10) 
C36 0.0207(11) 0.0313(13) 0.0301(13) 0.0026(10) 0.0116(10) 0.0059(10) 
C37 0.0201(11) 0.0230(11) 0.0263(12) -0.0021(9) 0.0047(9) -0.0027(9) 
C38 0.0180(10) 0.0168(10) 0.0239(11) 0.0001(9) 0.0100(9) 0.0016(8) 
C39 0.0142(10) 0.0316(13) 0.0273(12) -0.0146(9) 0.0047(9) 0.0008(9) 
C40 0.0173(11) 0.0496(15) 0.0263(12) -0.0126(11) 0.0071(10) 0.0041(10) 
C41 0.0217(12) 0.069(2) 0.0283(13) -0.0219(13) 0.0022(10) 0.0123(12) 
C42 0.0226(13) 0.0500(18) 0.060(2) -0.0354(16) -0.0039(13) 0.0042(13) 
C43 0.0259(13) 0.0266(14) 0.086(2) -0.0187(15) 0.0151(15) -0.0033(11) 
C44 0.0240(12) 0.0255(13) 0.0480(16) -0.0108(11) 0.0128(11) 0.0039(10) 
C45 0.0491(17) 0.0319(15) 0.066(2) -0.0001(14) 0.0301(16) 0.0018(13) 
C46 0.0279(13) 0.080(2) 0.0333(14) 0.0066(14) 0.0136(11) 0.0027(14) 
 
_geom_special_details 
; 
 All esds (except the esd in the dihedral angle between two l.s. planes) 
 are estimated using the full covariance matrix.  The cell esds are taken 
 into account individually in the estimation of esds in distances, angles 
 and torsion angles; correlations between esds in cell parameters are only 
 used when they are defined by crystal symmetry.  An approximate (isotropic) 
 treatment of cell esds is used for estimating esds involving l.s. planes. 
; 
 
loop_ 
 _geom_bond_atom_site_label_1 
 _geom_bond_atom_site_label_2 
 _geom_bond_distance 
 _geom_bond_site_symmetry_2 
 _geom_bond_publ_flag 
Ir1 C38 1.900(2) . ? 
Ir1 C19 2.036(2) . ? 
Ir1 C32 2.2306(18) . ? 
Ir1 C31 2.2608(19) . ? 
Ir1 C30 2.269(2) . ? 
Ir1 C28 2.312(2) . ? 
Ir1 C29 2.331(2) . ? 
Ir1 P1 2.4147(5) . ? 
P1 C19 1.805(2) . ? 
P1 C1 1.8766(19) . ? 
N1 C19 1.267(2) . ? 
N1 C20 1.424(3) . ? 
N2 C38 1.169(3) . ? 
N2 C39 1.402(3) . ? 
C1 C2 1.420(3) . ? 
C1 C6 1.432(3) . ? 
C2 C3 1.406(3) . ? 
C2 C7 1.558(3) . ? 
C3 C4 1.381(3) . ? 
C3 H3 0.9500 . ? 
C4 C5 1.394(3) . ? 
C4 C11 1.538(3) . ? 
C5 C6 1.399(3) . ? 
C5 H5 0.9500 . ? 
C6 C15 1.558(3) . ? 
C7 C8 1.533(3) . ? 
C7 C10 1.539(3) . ? 
C7 C9 1.552(3) . ? 
C8 H8A 0.9800 . ? 
C8 H8B 0.9800 . ? 
C8 H8C 0.9800 . ? 
C9 H9A 0.9800 . ? 
C9 H9B 0.9800 . ? 
C9 H9C 0.9800 . ? 
C10 H10A 0.9800 . ? 
C10 H10B 0.9800 . ? 
C10 H10C 0.9800 . ? 
C11 C14 1.531(3) . ? 
C11 C12 1.534(3) . ? 
C11 C13 1.537(3) . ? 
C12 H12A 0.9800 . ? 
C12 H12B 0.9800 . ? 
C12 H12C 0.9800 . ? 
C13 H13A 0.9800 . ? 
C13 H13B 0.9800 . ? 
C13 H13C 0.9800 . ? 
C14 H14A 0.9800 . ? 
C14 H14B 0.9800 . ? 
C14 H14C 0.9800 . ? 
C15 C18 1.532(3) . ? 
C15 C16 1.534(3) . ? 
C15 C17 1.547(3) . ? 
C16 H16A 0.9800 . ? 
C16 H16B 0.9800 . ? 
C16 H16C 0.9800 . ? 
C17 H17A 0.9800 . ? 
C17 H17B 0.9800 . ? 
C17 H17C 0.9800 . ? 
C18 H18A 0.9800 . ? 
C18 H18B 0.9800 . ? 
C18 H18C 0.9800 . ? 
C20 C25 1.402(3) . ? 
C20 C21 1.408(3) . ? 
C21 C22 1.395(3) . ? 
C21 C27 1.504(3) . ? 
C22 C23 1.378(4) . ? 
C22 H22 0.9500 . ? 
C23 C24 1.381(4) . ? 
C23 H23 0.9500 . ? 
C24 C25 1.397(3) . ? 
C24 H24 0.9500 . ? 
C25 C26 1.508(3) . ? 
C26 H26A 0.9800 . ? 
C26 H26B 0.9800 . ? 
C26 H26C 0.9800 . ? 
C27 H27A 0.9800 . ? 
C27 H27B 0.9800 . ? 
C27 H27C 0.9800 . ? 
C28 C29 1.414(3) . ? 
C28 C32 1.442(3) . ? 
C28 C33 1.502(3) . ? 
C29 C30 1.446(3) . ? 
C29 C34 1.507(3) . ? 
C30 C31 1.425(3) . ? 
C30 C35 1.507(3) . ? 
C31 C32 1.437(3) . ? 
C31 C36 1.500(3) . ? 
C32 C37 1.505(3) . ? 
C33 H33A 0.9800 . ? 
C33 H33B 0.9800 . ? 
C33 H33C 0.9800 . ? 
C34 H34A 0.9800 . ? 
C34 H34B 0.9800 . ? 
C34 H34C 0.9800 . ? 
C35 H35A 0.9800 . ? 
C35 H35B 0.9800 . ? 
C35 H35C 0.9800 . ? 
C36 H36A 0.9800 . ? 
C36 H36B 0.9800 . ? 
C36 H36C 0.9800 . ? 
C37 H37A 0.9800 . ? 
C37 H37B 0.9800 . ? 
C37 H37C 0.9800 . ? 
C39 C40 1.401(3) . ? 
C39 C44 1.401(3) . ? 
C40 C41 1.397(3) . ? 
C40 C46 1.499(4) . ? 
C41 C42 1.369(4) . ? 
C41 H41 0.9500 . ? 
C42 C43 1.376(4) . ? 
C42 H42 0.9500 . ? 
C43 C44 1.393(3) . ? 
C43 H43 0.9500 . ? 
C44 C45 1.496(4) . ? 
C45 H45A 0.9800 . ? 
C45 H45B 0.9800 . ? 
C45 H45C 0.9800 . ? 
C46 H46A 0.9800 . ? 
C46 H46B 0.9800 . ? 
C46 H46C 0.9800 . ? 
 
loop_ 
 _geom_angle_atom_site_label_1 
 _geom_angle_atom_site_label_2 
 _geom_angle_atom_site_label_3 
 _geom_angle 
 _geom_angle_site_symmetry_1 
 _geom_angle_site_symmetry_3 
 _geom_angle_publ_flag 
C38 Ir1 C19 90.99(8) . . ? 
C38 Ir1 C32 162.94(8) . . ? 
C19 Ir1 C32 101.07(7) . . ? 
C38 Ir1 C31 127.18(8) . . ? 
C19 Ir1 C31 108.18(7) . . ? 
C32 Ir1 C31 37.31(7) . . ? 
C38 Ir1 C30 101.53(8) . . ? 
C19 Ir1 C30 141.27(8) . . ? 
C32 Ir1 C30 61.59(7) . . ? 
C31 Ir1 C30 36.68(7) . . ? 
C38 Ir1 C28 138.88(8) . . ? 
C19 Ir1 C28 126.88(7) . . ? 
C32 Ir1 C28 36.97(7) . . ? 
C31 Ir1 C28 61.32(7) . . ? 
C30 Ir1 C28 60.57(8) . . ? 
C38 Ir1 C29 107.62(8) . . ? 
C19 Ir1 C29 161.38(7) . . ? 
C32 Ir1 C29 60.89(7) . . ? 
C31 Ir1 C29 61.02(7) . . ? 
C30 Ir1 C29 36.62(8) . . ? 
C28 Ir1 C29 35.47(7) . . ? 
C38 Ir1 P1 94.23(6) . . ? 
C19 Ir1 P1 46.91(6) . . ? 
C32 Ir1 P1 102.82(5) . . ? 
C31 Ir1 P1 134.87(5) . . ? 
C30 Ir1 P1 161.38(6) . . ? 
C28 Ir1 P1 100.94(5) . . ? 
C29 Ir1 P1 128.45(6) . . ? 
C19 P1 C1 109.30(8) . . ? 
C19 P1 Ir1 55.46(6) . . ? 
C1 P1 Ir1 111.84(6) . . ? 
C19 N1 C20 125.99(18) . . ? 
C38 N2 C39 171.7(2) . . ? 
C2 C1 C6 117.68(17) . . ? 
C2 C1 P1 122.11(14) . . ? 
C6 C1 P1 120.10(14) . . ? 
C3 C2 C1 118.12(18) . . ? 
C3 C2 C7 114.63(17) . . ? 
C1 C2 C7 127.05(17) . . ? 
C4 C3 C2 124.02(19) . . ? 
C4 C3 H3 118.0 . . ? 
C2 C3 H3 118.0 . . ? 
C3 C4 C5 115.75(18) . . ? 
C3 C4 C11 122.12(19) . . ? 
C5 C4 C11 121.61(19) . . ? 
C4 C5 C6 123.60(19) . . ? 
C4 C5 H5 118.2 . . ? 
C6 C5 H5 118.2 . . ? 
C5 C6 C1 118.26(18) . . ? 
C5 C6 C15 115.66(17) . . ? 
C1 C6 C15 125.95(17) . . ? 
C8 C7 C10 109.98(18) . . ? 
C8 C7 C9 108.36(19) . . ? 
C10 C7 C9 104.35(18) . . ? 
C8 C7 C2 110.70(17) . . ? 
C10 C7 C2 115.25(17) . . ? 
C9 C7 C2 107.78(17) . . ? 
C7 C8 H8A 109.5 . . ? 
C7 C8 H8B 109.5 . . ? 
H8A C8 H8B 109.5 . . ? 
C7 C8 H8C 109.5 . . ? 
H8A C8 H8C 109.5 . . ? 
H8B C8 H8C 109.5 . . ? 
C7 C9 H9A 109.5 . . ? 
C7 C9 H9B 109.5 . . ? 
H9A C9 H9B 109.5 . . ? 
C7 C9 H9C 109.5 . . ? 
H9A C9 H9C 109.5 . . ? 
H9B C9 H9C 109.5 . . ? 
C7 C10 H10A 109.5 . . ? 
C7 C10 H10B 109.5 . . ? 
H10A C10 H10B 109.5 . . ? 
C7 C10 H10C 109.5 . . ? 
H10A C10 H10C 109.5 . . ? 
H10B C10 H10C 109.5 . . ? 
C14 C11 C12 108.1(2) . . ? 
C14 C11 C13 109.3(2) . . ? 
C12 C11 C13 107.7(2) . . ? 
C14 C11 C4 111.60(18) . . ? 
C12 C11 C4 111.38(18) . . ? 
C13 C11 C4 108.75(17) . . ? 
C11 C12 H12A 109.5 . . ? 
C11 C12 H12B 109.5 . . ? 
H12A C12 H12B 109.5 . . ? 
C11 C12 H12C 109.5 . . ? 
H12A C12 H12C 109.5 . . ? 
H12B C12 H12C 109.5 . . ? 
C11 C13 H13A 109.5 . . ? 
C11 C13 H13B 109.5 . . ? 
H13A C13 H13B 109.5 . . ? 
C11 C13 H13C 109.5 . . ? 
H13A C13 H13C 109.5 . . ? 
H13B C13 H13C 109.5 . . ? 
C11 C14 H14A 109.5 . . ? 
C11 C14 H14B 109.5 . . ? 
H14A C14 H14B 109.5 . . ? 
C11 C14 H14C 109.5 . . ? 
H14A C14 H14C 109.5 . . ? 
H14B C14 H14C 109.5 . . ? 
C18 C15 C16 109.63(19) . . ? 
C18 C15 C17 107.64(18) . . ? 
C16 C15 C17 105.04(17) . . ? 
C18 C15 C6 111.04(17) . . ? 
C16 C15 C6 113.30(17) . . ? 
C17 C15 C6 109.88(17) . . ? 
C15 C16 H16A 109.5 . . ? 
C15 C16 H16B 109.5 . . ? 
H16A C16 H16B 109.5 . . ? 
C15 C16 H16C 109.5 . . ? 
H16A C16 H16C 109.5 . . ? 
H16B C16 H16C 109.5 . . ? 
C15 C17 H17A 109.5 . . ? 
C15 C17 H17B 109.5 . . ? 
H17A C17 H17B 109.5 . . ? 
C15 C17 H17C 109.5 . . ? 
H17A C17 H17C 109.5 . . ? 
H17B C17 H17C 109.5 . . ? 
C15 C18 H18A 109.5 . . ? 
C15 C18 H18B 109.5 . . ? 
H18A C18 H18B 109.5 . . ? 
C15 C18 H18C 109.5 . . ? 
H18A C18 H18C 109.5 . . ? 
H18B C18 H18C 109.5 . . ? 
N1 C19 P1 135.52(16) . . ? 
N1 C19 Ir1 143.61(15) . . ? 
P1 C19 Ir1 77.63(8) . . ? 
C25 C20 C21 120.78(19) . . ? 
C25 C20 N1 124.06(19) . . ? 
C21 C20 N1 114.95(19) . . ? 
C22 C21 C20 118.5(2) . . ? 
C22 C21 C27 120.7(2) . . ? 
C20 C21 C27 120.7(2) . . ? 
C23 C22 C21 120.9(2) . . ? 
C23 C22 H22 119.6 . . ? 
C21 C22 H22 119.6 . . ? 
C22 C23 C24 120.0(2) . . ? 
C22 C23 H23 120.0 . . ? 
C24 C23 H23 120.0 . . ? 
C23 C24 C25 121.2(2) . . ? 
C23 C24 H24 119.4 . . ? 
C25 C24 H24 119.4 . . ? 
C24 C25 C20 118.2(2) . . ? 
C24 C25 C26 120.0(2) . . ? 
C20 C25 C26 121.78(19) . . ? 
C25 C26 H26A 109.5 . . ? 
C25 C26 H26B 109.5 . . ? 
H26A C26 H26B 109.5 . . ? 
C25 C26 H26C 109.5 . . ? 
H26A C26 H26C 109.5 . . ? 
H26B C26 H26C 109.5 . . ? 
C21 C27 H27A 109.5 . . ? 
C21 C27 H27B 109.5 . . ? 
H27A C27 H27B 109.5 . . ? 
C21 C27 H27C 109.5 . . ? 
H27A C27 H27C 109.5 . . ? 
H27B C27 H27C 109.5 . . ? 
C29 C28 C32 108.12(19) . . ? 
C29 C28 C33 127.4(2) . . ? 
C32 C28 C33 124.39(19) . . ? 
C29 C28 Ir1 72.98(12) . . ? 
C32 C28 Ir1 68.44(11) . . ? 
C33 C28 Ir1 127.36(14) . . ? 
C28 C29 C30 107.75(18) . . ? 
C28 C29 C34 126.8(2) . . ? 
C30 C29 C34 125.0(2) . . ? 
C28 C29 Ir1 71.55(11) . . ? 
C30 C29 Ir1 69.38(11) . . ? 
C34 C29 Ir1 130.69(14) . . ? 
C31 C30 C29 108.59(18) . . ? 
C31 C30 C35 126.1(2) . . ? 
C29 C30 C35 124.9(2) . . ? 
C31 C30 Ir1 71.33(11) . . ? 
C29 C30 Ir1 74.00(11) . . ? 
C35 C30 Ir1 126.26(15) . . ? 
C30 C31 C32 107.21(18) . . ? 
C30 C31 C36 125.98(19) . . ? 
C32 C31 C36 126.38(18) . . ? 
C30 C31 Ir1 71.99(11) . . ? 
C32 C31 Ir1 70.21(10) . . ? 
C36 C31 Ir1 128.91(14) . . ? 
C31 C32 C28 108.20(18) . . ? 
C31 C32 C37 126.35(18) . . ? 
C28 C32 C37 124.85(19) . . ? 
C31 C32 Ir1 72.49(11) . . ? 
C28 C32 Ir1 74.59(11) . . ? 
C37 C32 Ir1 125.79(14) . . ? 
C28 C33 H33A 109.5 . . ? 
C28 C33 H33B 109.5 . . ? 
H33A C33 H33B 109.5 . . ? 
C28 C33 H33C 109.5 . . ? 
H33A C33 H33C 109.5 . . ? 
H33B C33 H33C 109.5 . . ? 
C29 C34 H34A 109.5 . . ? 
C29 C34 H34B 109.5 . . ? 
H34A C34 H34B 109.5 . . ? 
C29 C34 H34C 109.5 . . ? 
H34A C34 H34C 109.5 . . ? 
H34B C34 H34C 109.5 . . ? 
C30 C35 H35A 109.5 . . ? 
C30 C35 H35B 109.5 . . ? 
H35A C35 H35B 109.5 . . ? 
C30 C35 H35C 109.5 . . ? 
H35A C35 H35C 109.5 . . ? 
H35B C35 H35C 109.5 . . ? 
C31 C36 H36A 109.5 . . ? 
C31 C36 H36B 109.5 . . ? 
H36A C36 H36B 109.5 . . ? 
C31 C36 H36C 109.5 . . ? 
H36A C36 H36C 109.5 . . ? 
H36B C36 H36C 109.5 . . ? 
C32 C37 H37A 109.5 . . ? 
C32 C37 H37B 109.5 . . ? 
H37A C37 H37B 109.5 . . ? 
C32 C37 H37C 109.5 . . ? 
H37A C37 H37C 109.5 . . ? 
H37B C37 H37C 109.5 . . ? 
N2 C38 Ir1 177.27(19) . . ? 
C40 C39 N2 118.6(2) . . ? 
C40 C39 C44 122.9(2) . . ? 
N2 C39 C44 118.5(2) . . ? 
C41 C40 C39 117.0(2) . . ? 
C41 C40 C46 121.2(2) . . ? 
C39 C40 C46 121.8(2) . . ? 
C42 C41 C40 121.4(3) . . ? 
C42 C41 H41 119.3 . . ? 
C40 C41 H41 119.3 . . ? 
C41 C42 C43 120.1(2) . . ? 
C41 C42 H42 119.9 . . ? 
C43 C42 H42 119.9 . . ? 
C42 C43 C44 121.9(3) . . ? 
C42 C43 H43 119.1 . . ? 
C44 C43 H43 119.1 . . ? 
C43 C44 C39 116.6(3) . . ? 
C43 C44 C45 121.9(3) . . ? 
C39 C44 C45 121.4(2) . . ? 
C44 C45 H45A 109.5 . . ? 
C44 C45 H45B 109.5 . . ? 
H45A C45 H45B 109.5 . . ? 
C44 C45 H45C 109.5 . . ? 
H45A C45 H45C 109.5 . . ? 
H45B C45 H45C 109.5 . . ? 
C40 C46 H46A 109.5 . . ? 
C40 C46 H46B 109.5 . . ? 
H46A C46 H46B 109.5 . . ? 
C40 C46 H46C 109.5 . . ? 
H46A C46 H46C 109.5 . . ? 
H46B C46 H46C 109.5 . . ? 
 
loop_ 
 _geom_torsion_atom_site_label_1 
 _geom_torsion_atom_site_label_2 
 _geom_torsion_atom_site_label_3 
 _geom_torsion_atom_site_label_4 
 _geom_torsion 
 _geom_torsion_site_symmetry_1 
 _geom_torsion_site_symmetry_2 
 _geom_torsion_site_symmetry_3 
 _geom_torsion_site_symmetry_4 
 _geom_torsion_publ_flag 
C38 Ir1 P1 C19 87.39(9) . . . . ? 
C32 Ir1 P1 C19 -93.25(9) . . . . ? 
C31 Ir1 P1 C19 -70.84(10) . . . . ? 
C30 Ir1 P1 C19 -124.70(18) . . . . ? 
C28 Ir1 P1 C19 -131.02(9) . . . . ? 
C29 Ir1 P1 C19 -156.10(9) . . . . ? 
C38 Ir1 P1 C1 -11.61(9) . . . . ? 
C19 Ir1 P1 C1 -99.00(10) . . . . ? 
C32 Ir1 P1 C1 167.75(8) . . . . ? 
C31 Ir1 P1 C1 -169.84(10) . . . . ? 
C30 Ir1 P1 C1 136.30(18) . . . . ? 
C28 Ir1 P1 C1 129.98(8) . . . . ? 
C29 Ir1 P1 C1 104.90(9) . . . . ? 
C19 P1 C1 C2 47.91(18) . . . . ? 
Ir1 P1 C1 C2 107.46(15) . . . . ? 
C19 P1 C1 C6 -128.23(16) . . . . ? 
Ir1 P1 C1 C6 -68.69(16) . . . . ? 
C6 C1 C2 C3 17.0(3) . . . . ? 
P1 C1 C2 C3 -159.28(15) . . . . ? 
C6 C1 C2 C7 -157.65(18) . . . . ? 
P1 C1 C2 C7 26.1(3) . . . . ? 
C1 C2 C3 C4 -5.5(3) . . . . ? 
C7 C2 C3 C4 169.79(19) . . . . ? 
C2 C3 C4 C5 -6.3(3) . . . . ? 
C2 C3 C4 C11 -178.21(19) . . . . ? 
C3 C4 C5 C6 6.6(3) . . . . ? 
C11 C4 C5 C6 178.52(19) . . . . ? 
C4 C5 C6 C1 4.9(3) . . . . ? 
C4 C5 C6 C15 -171.34(18) . . . . ? 
C2 C1 C6 C5 -16.7(3) . . . . ? 
P1 C1 C6 C5 159.61(15) . . . . ? 
C2 C1 C6 C15 159.08(19) . . . . ? 
P1 C1 C6 C15 -24.6(3) . . . . ? 
C3 C2 C7 C8 69.9(2) . . . . ? 
C1 C2 C7 C8 -115.4(2) . . . . ? 
C3 C2 C7 C10 -164.55(18) . . . . ? 
C1 C2 C7 C10 10.2(3) . . . . ? 
C3 C2 C7 C9 -48.5(2) . . . . ? 
C1 C2 C7 C9 126.3(2) . . . . ? 
C3 C4 C11 C14 -156.0(2) . . . . ? 
C5 C4 C11 C14 32.6(3) . . . . ? 
C3 C4 C11 C12 -35.1(3) . . . . ? 
C5 C4 C11 C12 153.5(2) . . . . ? 
C3 C4 C11 C13 83.4(3) . . . . ? 
C5 C4 C11 C13 -88.0(2) . . . . ? 
C5 C6 C15 C18 -84.2(2) . . . . ? 
C1 C6 C15 C18 99.9(2) . . . . ? 
C5 C6 C15 C16 151.86(19) . . . . ? 
C1 C6 C15 C16 -24.0(3) . . . . ? 
C5 C6 C15 C17 34.7(2) . . . . ? 
C1 C6 C15 C17 -141.2(2) . . . . ? 
C20 N1 C19 P1 -155.54(17) . . . . ? 
C20 N1 C19 Ir1 -5.5(4) . . . . ? 
C1 P1 C19 N1 -93.9(2) . . . . ? 
Ir1 P1 C19 N1 162.3(2) . . . . ? 
C1 P1 C19 Ir1 103.73(8) . . . . ? 
C38 Ir1 C19 N1 106.1(3) . . . . ? 
C32 Ir1 C19 N1 -61.7(3) . . . . ? 
C31 Ir1 C19 N1 -23.8(3) . . . . ? 
C30 Ir1 C19 N1 -3.8(3) . . . . ? 
C28 Ir1 C19 N1 -91.2(3) . . . . ? 
C29 Ir1 C19 N1 -75.3(4) . . . . ? 
P1 Ir1 C19 N1 -159.0(3) . . . . ? 
C38 Ir1 C19 P1 -94.87(8) . . . . ? 
C32 Ir1 C19 P1 97.27(7) . . . . ? 
C31 Ir1 C19 P1 135.20(7) . . . . ? 
C30 Ir1 C19 P1 155.20(9) . . . . ? 
C28 Ir1 C19 P1 67.85(10) . . . . ? 
C29 Ir1 C19 P1 83.7(2) . . . . ? 
C19 N1 C20 C25 -66.3(3) . . . . ? 
C19 N1 C20 C21 118.9(2) . . . . ? 
C25 C20 C21 C22 6.9(3) . . . . ? 
N1 C20 C21 C22 -178.10(19) . . . . ? 
C25 C20 C21 C27 -171.6(2) . . . . ? 
N1 C20 C21 C27 3.4(3) . . . . ? 
C20 C21 C22 C23 -4.2(3) . . . . ? 
C27 C21 C22 C23 174.3(2) . . . . ? 
C21 C22 C23 C24 -1.1(4) . . . . ? 
C22 C23 C24 C25 3.9(4) . . . . ? 
C23 C24 C25 C20 -1.2(4) . . . . ? 
C23 C24 C25 C26 180.0(2) . . . . ? 
C21 C20 C25 C24 -4.3(3) . . . . ? 
N1 C20 C25 C24 -178.7(2) . . . . ? 
C21 C20 C25 C26 174.5(2) . . . . ? 
N1 C20 C25 C26 0.0(3) . . . . ? 
C38 Ir1 C28 C29 -35.48(18) . . . . ? 
C19 Ir1 C28 C29 171.36(12) . . . . ? 
C32 Ir1 C28 C29 118.07(18) . . . . ? 
C31 Ir1 C28 C29 79.40(13) . . . . ? 
C30 Ir1 C28 C29 37.22(12) . . . . ? 
P1 Ir1 C28 C29 -145.09(11) . . . . ? 
C38 Ir1 C28 C32 -153.55(13) . . . . ? 
C19 Ir1 C28 C32 53.29(15) . . . . ? 
C31 Ir1 C28 C32 -38.67(12) . . . . ? 
C30 Ir1 C28 C32 -80.85(13) . . . . ? 
C29 Ir1 C28 C32 -118.07(18) . . . . ? 
P1 Ir1 C28 C32 96.83(11) . . . . ? 
C38 Ir1 C28 C33 88.9(2) . . . . ? 
C19 Ir1 C28 C33 -64.3(2) . . . . ? 
C32 Ir1 C28 C33 -117.5(2) . . . . ? 
C31 Ir1 C28 C33 -156.2(2) . . . . ? 
C30 Ir1 C28 C33 161.6(2) . . . . ? 
C29 Ir1 C28 C33 124.4(2) . . . . ? 
P1 Ir1 C28 C33 -20.71(19) . . . . ? 
C32 C28 C29 C30 -0.5(2) . . . . ? 
C33 C28 C29 C30 175.40(19) . . . . ? 
Ir1 C28 C29 C30 -60.22(14) . . . . ? 
C32 C28 C29 C34 -172.81(19) . . . . ? 
C33 C28 C29 C34 3.1(3) . . . . ? 
Ir1 C28 C29 C34 127.5(2) . . . . ? 
C32 C28 C29 Ir1 59.70(13) . . . . ? 
C33 C28 C29 Ir1 -124.4(2) . . . . ? 
C38 Ir1 C29 C28 156.39(13) . . . . ? 
C19 Ir1 C29 C28 -22.1(3) . . . . ? 
C32 Ir1 C29 C28 -37.40(12) . . . . ? 
C31 Ir1 C29 C28 -80.32(13) . . . . ? 
C30 Ir1 C29 C28 -117.97(17) . . . . ? 
P1 Ir1 C29 C28 45.84(14) . . . . ? 
C38 Ir1 C29 C30 -85.64(13) . . . . ? 
C19 Ir1 C29 C30 95.9(3) . . . . ? 
C32 Ir1 C29 C30 80.57(12) . . . . ? 
C31 Ir1 C29 C30 37.65(11) . . . . ? 
C28 Ir1 C29 C30 117.97(17) . . . . ? 
P1 Ir1 C29 C30 163.81(9) . . . . ? 
C38 Ir1 C29 C34 33.3(2) . . . . ? 
C19 Ir1 C29 C34 -145.2(2) . . . . ? 
C32 Ir1 C29 C34 -160.4(2) . . . . ? 
C31 Ir1 C29 C34 156.6(2) . . . . ? 
C30 Ir1 C29 C34 119.0(3) . . . . ? 
C28 Ir1 C29 C34 -123.0(3) . . . . ? 
P1 Ir1 C29 C34 -77.2(2) . . . . ? 
C28 C29 C30 C31 -1.8(2) . . . . ? 
C34 C29 C30 C31 170.66(19) . . . . ? 
Ir1 C29 C30 C31 -63.40(13) . . . . ? 
C28 C29 C30 C35 -175.02(19) . . . . ? 
C34 C29 C30 C35 -2.6(3) . . . . ? 
Ir1 C29 C30 C35 123.4(2) . . . . ? 
C28 C29 C30 Ir1 61.60(14) . . . . ? 
C34 C29 C30 Ir1 -125.9(2) . . . . ? 
C38 Ir1 C30 C31 -139.36(13) . . . . ? 
C19 Ir1 C30 C31 -32.96(18) . . . . ? 
C32 Ir1 C30 C31 38.04(12) . . . . ? 
C28 Ir1 C30 C31 80.50(13) . . . . ? 
C29 Ir1 C30 C31 116.54(17) . . . . ? 
P1 Ir1 C30 C31 73.4(2) . . . . ? 
C38 Ir1 C30 C29 104.10(12) . . . . ? 
C19 Ir1 C30 C29 -149.50(13) . . . . ? 
C32 Ir1 C30 C29 -78.50(12) . . . . ? 
C31 Ir1 C30 C29 -116.54(17) . . . . ? 
C28 Ir1 C30 C29 -36.05(11) . . . . ? 
P1 Ir1 C30 C29 -43.2(2) . . . . ? 
C38 Ir1 C30 C35 -17.8(2) . . . . ? 
C19 Ir1 C30 C35 88.6(2) . . . . ? 
C32 Ir1 C30 C35 159.6(2) . . . . ? 
C31 Ir1 C30 C35 121.6(3) . . . . ? 
C28 Ir1 C30 C35 -157.9(2) . . . . ? 
C29 Ir1 C30 C35 -121.9(2) . . . . ? 
P1 Ir1 C30 C35 -165.07(14) . . . . ? 
C29 C30 C31 C32 3.4(2) . . . . ? 
C35 C30 C31 C32 176.51(19) . . . . ? 
Ir1 C30 C31 C32 -61.74(13) . . . . ? 
C29 C30 C31 C36 -169.40(19) . . . . ? 
C35 C30 C31 C36 3.7(3) . . . . ? 
Ir1 C30 C31 C36 125.5(2) . . . . ? 
C29 C30 C31 Ir1 65.13(14) . . . . ? 
C35 C30 C31 Ir1 -121.8(2) . . . . ? 
C38 Ir1 C31 C30 53.23(16) . . . . ? 
C19 Ir1 C31 C30 159.01(12) . . . . ? 
C32 Ir1 C31 C30 -116.59(17) . . . . ? 
C28 Ir1 C31 C30 -78.28(13) . . . . ? 
C29 Ir1 C31 C30 -37.59(12) . . . . ? 
P1 Ir1 C31 C30 -154.43(10) . . . . ? 
C38 Ir1 C31 C32 169.83(12) . . . . ? 
C19 Ir1 C31 C32 -84.40(13) . . . . ? 
C30 Ir1 C31 C32 116.59(17) . . . . ? 
C28 Ir1 C31 C32 38.31(12) . . . . ? 
C29 Ir1 C31 C32 79.01(13) . . . . ? 
P1 Ir1 C31 C32 -37.84(14) . . . . ? 
C38 Ir1 C31 C36 -68.9(2) . . . . ? 
C19 Ir1 C31 C36 36.9(2) . . . . ? 
C32 Ir1 C31 C36 121.3(2) . . . . ? 
C30 Ir1 C31 C36 -122.1(2) . . . . ? 
C28 Ir1 C31 C36 159.6(2) . . . . ? 
C29 Ir1 C31 C36 -159.7(2) . . . . ? 
P1 Ir1 C31 C36 83.47(19) . . . . ? 
C30 C31 C32 C28 -3.7(2) . . . . ? 
C36 C31 C32 C28 169.06(19) . . . . ? 
Ir1 C31 C32 C28 -66.60(13) . . . . ? 
C30 C31 C32 C37 -175.15(18) . . . . ? 
C36 C31 C32 C37 -2.4(3) . . . . ? 
Ir1 C31 C32 C37 122.0(2) . . . . ? 
C30 C31 C32 Ir1 62.90(13) . . . . ? 
C36 C31 C32 Ir1 -124.3(2) . . . . ? 
C29 C28 C32 C31 2.6(2) . . . . ? 
C33 C28 C32 C31 -173.44(18) . . . . ? 
Ir1 C28 C32 C31 65.21(13) . . . . ? 
C29 C28 C32 C37 174.23(18) . . . . ? 
C33 C28 C32 C37 -1.8(3) . . . . ? 
Ir1 C28 C32 C37 -123.18(19) . . . . ? 
C29 C28 C32 Ir1 -62.59(14) . . . . ? 
C33 C28 C32 Ir1 121.34(19) . . . . ? 
C38 Ir1 C32 C31 -28.7(3) . . . . ? 
C19 Ir1 C32 C31 105.54(12) . . . . ? 
C30 Ir1 C32 C31 -37.39(12) . . . . ? 
C28 Ir1 C32 C31 -115.26(17) . . . . ? 
C29 Ir1 C32 C31 -79.38(13) . . . . ? 
P1 Ir1 C32 C31 153.52(10) . . . . ? 
C38 Ir1 C32 C28 86.6(3) . . . . ? 
C19 Ir1 C32 C28 -139.20(12) . . . . ? 
C31 Ir1 C32 C28 115.26(17) . . . . ? 
C30 Ir1 C32 C28 77.86(13) . . . . ? 
C29 Ir1 C32 C28 35.88(12) . . . . ? 
P1 Ir1 C32 C28 -91.22(12) . . . . ? 
C38 Ir1 C32 C37 -151.3(2) . . . . ? 
C19 Ir1 C32 C37 -17.06(19) . . . . ? 
C31 Ir1 C32 C37 -122.6(2) . . . . ? 
C30 Ir1 C32 C37 -160.0(2) . . . . ? 
C28 Ir1 C32 C37 122.1(2) . . . . ? 
C29 Ir1 C32 C37 158.0(2) . . . . ? 
P1 Ir1 C32 C37 30.92(18) . . . . ? 
N2 C39 C40 C41 -179.1(2) . . . . ? 
C44 C39 C40 C41 0.2(3) . . . . ? 
N2 C39 C40 C46 1.3(3) . . . . ? 
C44 C39 C40 C46 -179.4(2) . . . . ? 
C39 C40 C41 C42 0.8(3) . . . . ? 
C46 C40 C41 C42 -179.5(2) . . . . ? 
C40 C41 C42 C43 -1.6(4) . . . . ? 
C41 C42 C43 C44 1.2(4) . . . . ? 
C42 C43 C44 C39 -0.2(4) . . . . ? 
C42 C43 C44 C45 178.8(2) . . . . ? 
C40 C39 C44 C43 -0.6(3) . . . . ? 
N2 C39 C44 C43 178.7(2) . . . . ? 
C40 C39 C44 C45 -179.5(2) . . . . ? 
N2 C39 C44 C45 -0.2(3) . . . . ? 
 
_diffrn_measured_fraction_theta_max    1.000 
_diffrn_reflns_theta_full              27.52 
_diffrn_measured_fraction_theta_full   1.000 
_refine_diff_density_max    1.054 
_refine_diff_density_min   -0.537 
_refine_diff_density_rms    0.075 


#===END


 
data_s3725a 
 
_audit_creation_method            SHELXL-97 
_chemical_name_systematic 
; 
 ? 
; 
_chemical_name_common             ? 
_chemical_melting_point           ? 
_chemical_formula_moiety
 'C37 H44 Ir N2 P'
_chemical_formula_sum 
 'C37 H44 Ir N2 P' 
_chemical_formula_weight          739.91 
 
loop_ 
 _atom_type_symbol 
 _atom_type_description 
 _atom_type_scat_dispersion_real 
 _atom_type_scat_dispersion_imag 
 _atom_type_scat_source 
 'C'  'C'   0.0033   0.0016 
 'International Tables Vol C Tables 4.2.6.8 and 6.1.1.4' 
 'H'  'H'   0.0000   0.0000 
 'International Tables Vol C Tables 4.2.6.8 and 6.1.1.4' 
 'Ir'  'Ir'  -1.4442   7.9887 
 'International Tables Vol C Tables 4.2.6.8 and 6.1.1.4' 
 'N'  'N'   0.0061   0.0033 
 'International Tables Vol C Tables 4.2.6.8 and 6.1.1.4' 
 'P'  'P'   0.1023   0.0942 
 'International Tables Vol C Tables 4.2.6.8 and 6.1.1.4' 
 
_symmetry_cell_setting            monoclinic
_symmetry_space_group_name_H-M    'P 21/c'
_symmetry_space_group_name_Hall   '-P 2ybc'
 
loop_ 
 _symmetry_equiv_pos_as_xyz 
 'x, y, z' 
 '-x, y+1/2, -z+1/2' 
 '-x, -y, -z' 
 'x, -y-1/2, z-1/2' 
 
_cell_length_a                    11.8147(2) 
_cell_length_b                    14.3753(4) 
_cell_length_c                    20.8906(4) 
_cell_angle_alpha                 90.00 
_cell_angle_beta                  113.837(2) 
_cell_angle_gamma                 90.00 
_cell_volume                      3245.39(12) 
_cell_formula_units_Z             4 
_cell_measurement_temperature     150(2) 
_cell_measurement_reflns_used     32971
_cell_measurement_theta_min       1.77 
_cell_measurement_theta_max       27.50
 
_exptl_crystal_description        needle
_exptl_crystal_colour             yellow
_exptl_crystal_size_max           0.40
_exptl_crystal_size_mid           0.15
_exptl_crystal_size_min           0.12
_exptl_crystal_density_meas       ? 
_exptl_crystal_density_diffrn     1.514 
_exptl_crystal_density_method     'not measured' 
_exptl_crystal_F_000              1488 
_exptl_absorpt_coefficient_mu     4.191 
_exptl_absorpt_correction_type    'multi-scan'
_exptl_absorpt_correction_T_min   0.21
_exptl_absorpt_correction_T_max   0.61
_exptl_absorpt_process_details    ? 
 
_exptl_special_details 
; 
 ? 
; 
 
_diffrn_ambient_temperature       150(2) 
_diffrn_radiation_wavelength      0.71073 
_diffrn_radiation_type            MoK\a 
_diffrn_radiation_source          'rotating anode' 
_diffrn_radiation_monochromator   graphite 
_diffrn_measurement_device_type   'Nonius KappaCCD'
_diffrn_measurement_method        '\f and \w scans'
_diffrn_detector_area_resol_mean  ? 
_diffrn_standards_number          ? 
_diffrn_standards_interval_count  ? 
_diffrn_standards_interval_time   ? 
_diffrn_standards_decay_%         ? 
_diffrn_reflns_number             68819 
_diffrn_reflns_av_R_equivalents   0.0332 
_diffrn_reflns_av_sigmaI/netI     0.0192 
_diffrn_reflns_limit_h_min        -15 
_diffrn_reflns_limit_h_max        15 
_diffrn_reflns_limit_k_min        -18 
_diffrn_reflns_limit_k_max        18 
_diffrn_reflns_limit_l_min        -27 
_diffrn_reflns_limit_l_max        27 
_diffrn_reflns_theta_min          1.77 
_diffrn_reflns_theta_max          27.50 
_reflns_number_total              7452 
_reflns_number_gt                 6463 
_reflns_threshold_expression      'I>2\s(I)'
 
_computing_data_collection        'Nonius COLLECT'
_computing_cell_refinement        'Peakref'
_computing_data_reduction         'EvalCCD, Sadabs'
_computing_structure_solution     'DIRDIF-99 (Beurskens et al., 1999)' 
_computing_structure_refinement   'SHELXL-97 (Sheldrick, 1997)' 
_computing_molecular_graphics     ? 
_computing_publication_material   ? 
 
_refine_special_details 
; 
 Refinement of F^2^ against ALL reflections.  The weighted R-factor wR and 
 goodness of fit S are based on F^2^, conventional R-factors R are based 
 on F, with F set to zero for negative F^2^. The threshold expression of 
 F^2^ > 2sigma(F^2^) is used only for calculating R-factors(gt) etc. and is 
 not relevant to the choice of reflections for refinement.  R-factors based 
 on F^2^ are statistically about twice as large as those based on F, and R- 
 factors based on ALL data will be even larger. 
; 
 
_refine_ls_structure_factor_coef  Fsqd  
_refine_ls_matrix_type            full 
_refine_ls_weighting_scheme       calc  
_refine_ls_weighting_details 
 'calc w=1/[\s^2^(Fo^2^)+(0.0121P)^2^+4.0492P] where P=(Fo^2^+2Fc^2^)/3' 
_atom_sites_solution_primary      direct 
_atom_sites_solution_secondary    difmap 
_atom_sites_solution_hydrogens    difmap
_refine_ls_hydrogen_treatment     constr
_refine_ls_extinction_method      none 
_refine_ls_extinction_coef        ? 
_refine_ls_number_reflns          7452 
_refine_ls_number_parameters      382 
_refine_ls_number_restraints      0 
_refine_ls_R_factor_all           0.0277 
_refine_ls_R_factor_gt            0.0193 
_refine_ls_wR_factor_ref          0.0412 
_refine_ls_wR_factor_gt           0.0389 
_refine_ls_goodness_of_fit_ref    1.053 
_refine_ls_restrained_S_all       1.053 
_refine_ls_shift/su_max           0.004 
_refine_ls_shift/su_mean          0.000 
 
loop_ 
 _atom_site_label 
 _atom_site_type_symbol 
 _atom_site_fract_x 
 _atom_site_fract_y 
 _atom_site_fract_z 
 _atom_site_U_iso_or_equiv 
 _atom_site_adp_type 
 _atom_site_occupancy 
 _atom_site_symmetry_multiplicity 
 _atom_site_calc_flag 
 _atom_site_refinement_flags 
 _atom_site_disorder_assembly 
 _atom_site_disorder_group 
Ir1 Ir 0.468677(8) 0.177191(6) 0.626405(5) 0.01932(3) Uani 1 1 d . . . 
P1 P 0.59264(6) 0.15056(4) 0.56147(3) 0.02392(13) Uani 1 1 d . . . 
N1 N 0.3837(2) 0.25817(15) 0.47375(11) 0.0286(5) Uani 1 1 d . . . 
N2 N 0.6180(2) 0.35059(14) 0.69591(12) 0.0281(5) Uani 1 1 d . . . 
C1 C 0.7282(2) 0.22755(16) 0.59099(12) 0.0223(5) Uani 1 1 d . . . 
C2 C 0.7460(2) 0.29299(16) 0.54551(13) 0.0246(5) Uani 1 1 d . . . 
C3 C 0.8532(2) 0.34638(17) 0.56917(14) 0.0294(6) Uani 1 1 d . . . 
H3 H 0.8641 0.3905 0.5383 0.035 Uiso 1 1 calc R . . 
C4 C 0.9450(2) 0.33759(17) 0.63641(14) 0.0284(5) Uani 1 1 d . . . 
C5 C 0.9294(2) 0.26904(17) 0.67900(13) 0.0275(5) Uani 1 1 d . . . 
H5 H 0.9927 0.2600 0.7244 0.033 Uiso 1 1 calc R . . 
C6 C 0.8245(2) 0.21327(17) 0.65761(13) 0.0247(5) Uani 1 1 d . . . 
C7 C 0.6505(3) 0.30735(19) 0.47143(13) 0.0335(6) Uani 1 1 d . . . 
H7A H 0.6139 0.2473 0.4514 0.050 Uiso 1 1 calc R . . 
H7B H 0.6903 0.3348 0.4429 0.050 Uiso 1 1 calc R . . 
H7C H 0.5855 0.3492 0.4721 0.050 Uiso 1 1 calc R . . 
C8 C 1.0561(3) 0.4011(2) 0.66186(16) 0.0378(6) Uani 1 1 d . . . 
H8A H 1.0851 0.4100 0.6245 0.057 Uiso 1 1 calc R . . 
H8B H 1.1223 0.3731 0.7026 0.057 Uiso 1 1 calc R . . 
H8C H 1.0332 0.4614 0.6750 0.057 Uiso 1 1 calc R . . 
C9 C 0.8153(2) 0.13790(19) 0.70585(14) 0.0317(6) Uani 1 1 d . . . 
H9A H 0.7462 0.1516 0.7189 0.048 Uiso 1 1 calc R . . 
H9B H 0.8925 0.1356 0.7481 0.048 Uiso 1 1 calc R . . 
H9C H 0.8015 0.0777 0.6818 0.048 Uiso 1 1 calc R . . 
C10 C 0.4557(2) 0.22168(16) 0.53098(13) 0.0231(5) Uani 1 1 d . . . 
C11 C 0.2612(2) 0.28914(17) 0.46021(13) 0.0272(5) Uani 1 1 d . . . 
C12 C 0.1673(2) 0.24391(18) 0.40470(13) 0.0290(5) Uani 1 1 d . . . 
C13 C 0.0460(3) 0.27249(19) 0.38589(14) 0.0343(6) Uani 1 1 d . . . 
H13 H -0.0187 0.2414 0.3490 0.041 Uiso 1 1 calc R . . 
C14 C 0.0174(3) 0.34572(19) 0.42004(16) 0.0376(7) Uani 1 1 d . . . 
H14 H -0.0662 0.3643 0.4068 0.045 Uiso 1 1 calc R . . 
C15 C 0.1111(3) 0.39116(19) 0.47326(15) 0.0352(6) Uani 1 1 d . . . 
H15 H 0.0914 0.4418 0.4962 0.042 Uiso 1 1 calc R . . 
C16 C 0.2347(3) 0.36444(18) 0.49433(14) 0.0316(6) Uani 1 1 d . . . 
C17 C 0.1975(3) 0.16631(19) 0.36529(14) 0.0338(6) Uani 1 1 d . . . 
H17A H 0.1206 0.1394 0.3311 0.051 Uiso 1 1 calc R . . 
H17B H 0.2451 0.1180 0.3983 0.051 Uiso 1 1 calc R . . 
H17C H 0.2465 0.1912 0.3409 0.051 Uiso 1 1 calc R . . 
C18 C 0.3346(3) 0.4181(2) 0.55114(16) 0.0447(8) Uani 1 1 d . . . 
H18A H 0.3535 0.3879 0.5964 0.067 Uiso 1 1 calc R . . 
H18B H 0.3063 0.4818 0.5525 0.067 Uiso 1 1 calc R . . 
H18C H 0.4093 0.4195 0.5416 0.067 Uiso 1 1 calc R . . 
C19 C 0.4397(2) 0.02612(16) 0.64917(13) 0.0244(5) Uani 1 1 d . . . 
C20 C 0.3283(2) 0.06259(16) 0.59599(13) 0.0242(5) Uani 1 1 d . . . 
C21 C 0.2836(2) 0.13683(17) 0.62584(14) 0.0264(5) Uani 1 1 d . . . 
C22 C 0.3706(3) 0.14762(17) 0.69628(14) 0.0283(6) Uani 1 1 d . . . 
C23 C 0.4669(2) 0.07802(17) 0.71164(13) 0.0281(5) Uani 1 1 d . . . 
C24 C 0.5153(3) -0.05262(17) 0.64026(16) 0.0362(6) Uani 1 1 d . . . 
H24A H 0.6035 -0.0386 0.6657 0.054 Uiso 1 1 calc R . . 
H24B H 0.4967 -0.0608 0.5904 0.054 Uiso 1 1 calc R . . 
H24C H 0.4952 -0.1099 0.6589 0.054 Uiso 1 1 calc R . . 
C25 C 0.2601(3) 0.02191(19) 0.52447(14) 0.0344(6) Uani 1 1 d . . . 
H25A H 0.2134 -0.0329 0.5278 0.052 Uiso 1 1 calc R . . 
H25B H 0.3194 0.0037 0.5049 0.052 Uiso 1 1 calc R . . 
H25C H 0.2028 0.0683 0.4940 0.052 Uiso 1 1 calc R . . 
C26 C 0.1638(3) 0.1872(2) 0.59111(17) 0.0406(7) Uani 1 1 d . . . 
H26A H 0.0985 0.1533 0.5989 0.061 Uiso 1 1 calc R . . 
H26B H 0.1426 0.1915 0.5407 0.061 Uiso 1 1 calc R . . 
H26C H 0.1715 0.2499 0.6108 0.061 Uiso 1 1 calc R . . 
C27 C 0.3596(3) 0.2145(2) 0.74912(16) 0.0439(8) Uani 1 1 d . . . 
H27A H 0.3218 0.2726 0.7256 0.066 Uiso 1 1 calc R . . 
H27B H 0.4420 0.2275 0.7853 0.066 Uiso 1 1 calc R . . 
H27C H 0.3077 0.1868 0.7707 0.066 Uiso 1 1 calc R . . 
C28 C 0.5690(3) 0.0576(2) 0.78170(14) 0.0416(7) Uani 1 1 d . . . 
H28A H 0.5410 0.0107 0.8061 0.062 Uiso 1 1 calc R . . 
H28B H 0.5913 0.1148 0.8096 0.062 Uiso 1 1 calc R . . 
H28C H 0.6414 0.0341 0.7751 0.062 Uiso 1 1 calc R . . 
C29 C 0.5604(2) 0.28447(16) 0.66899(12) 0.0223(5) Uani 1 1 d . . . 
C30 C 0.7169(2) 0.40896(16) 0.73434(14) 0.0267(5) Uani 1 1 d . . . 
C31 C 0.7470(2) 0.48168(17) 0.69938(15) 0.0314(6) Uani 1 1 d . . . 
C32 C 0.8502(3) 0.53523(19) 0.73839(17) 0.0381(7) Uani 1 1 d . . . 
H32 H 0.8746 0.5841 0.7161 0.046 Uiso 1 1 calc R . . 
C33 C 0.9175(3) 0.5190(2) 0.80837(18) 0.0422(7) Uani 1 1 d . . . 
H33 H 0.9878 0.5562 0.8338 0.051 Uiso 1 1 calc R . . 
C34 C 0.8833(3) 0.4485(2) 0.84207(16) 0.0390(7) Uani 1 1 d . . . 
H34 H 0.9294 0.4387 0.8907 0.047 Uiso 1 1 calc R . . 
C35 C 0.7824(2) 0.39181(18) 0.80572(15) 0.0309(6) Uani 1 1 d . . . 
C36 C 0.6716(3) 0.5013(2) 0.62386(16) 0.0424(7) Uani 1 1 d . . . 
H36A H 0.5920 0.5283 0.6184 0.064 Uiso 1 1 calc R . . 
H36B H 0.6572 0.4432 0.5972 0.064 Uiso 1 1 calc R . . 
H36C H 0.7160 0.5452 0.6065 0.064 Uiso 1 1 calc R . . 
C37 C 0.7450(3) 0.3138(2) 0.84116(16) 0.0396(7) Uani 1 1 d . . . 
H37A H 0.7984 0.3140 0.8913 0.059 Uiso 1 1 calc R . . 
H37B H 0.7536 0.2543 0.8207 0.059 Uiso 1 1 calc R . . 
H37C H 0.6587 0.3224 0.8346 0.059 Uiso 1 1 calc R . . 
 
loop_ 
 _atom_site_aniso_label 
 _atom_site_aniso_U_11 
 _atom_site_aniso_U_22 
 _atom_site_aniso_U_33 
 _atom_site_aniso_U_23 
 _atom_site_aniso_U_13 
 _atom_site_aniso_U_12 
Ir1 0.02175(5) 0.01668(4) 0.02086(5) 0.00075(4) 0.00997(3) -0.00044(4) 
P1 0.0272(3) 0.0232(3) 0.0238(3) -0.0030(2) 0.0129(3) -0.0014(2) 
N1 0.0258(11) 0.0347(12) 0.0238(11) 0.0016(9) 0.0086(9) -0.0033(9) 
N2 0.0293(12) 0.0230(10) 0.0364(12) -0.0062(9) 0.0178(10) -0.0037(9) 
C1 0.0236(12) 0.0218(11) 0.0261(12) -0.0020(9) 0.0149(10) 0.0018(9) 
C2 0.0273(13) 0.0243(11) 0.0255(12) 0.0003(10) 0.0141(11) 0.0024(10) 
C3 0.0316(14) 0.0264(12) 0.0350(14) 0.0045(10) 0.0185(12) 0.0014(10) 
C4 0.0239(13) 0.0283(13) 0.0354(14) -0.0016(11) 0.0146(11) 0.0026(10) 
C5 0.0229(13) 0.0313(13) 0.0273(13) -0.0009(10) 0.0093(11) 0.0029(10) 
C6 0.0254(13) 0.0247(12) 0.0272(13) 0.0014(10) 0.0139(11) 0.0064(10) 
C7 0.0351(15) 0.0401(15) 0.0266(13) 0.0042(11) 0.0139(12) -0.0055(12) 
C8 0.0301(15) 0.0367(15) 0.0466(17) -0.0007(13) 0.0155(13) -0.0042(12) 
C9 0.0268(14) 0.0342(14) 0.0318(14) 0.0086(11) 0.0096(12) 0.0050(11) 
C10 0.0239(13) 0.0212(11) 0.0247(12) -0.0023(9) 0.0103(10) -0.0045(9) 
C11 0.0266(13) 0.0286(12) 0.0265(13) 0.0097(10) 0.0108(11) 0.0001(10) 
C12 0.0287(14) 0.0314(13) 0.0256(13) 0.0069(10) 0.0096(11) -0.0016(11) 
C13 0.0283(15) 0.0365(15) 0.0339(15) 0.0040(12) 0.0083(12) -0.0027(11) 
C14 0.0272(14) 0.0375(15) 0.0447(17) 0.0067(13) 0.0110(13) 0.0048(11) 
C15 0.0379(16) 0.0273(13) 0.0386(16) 0.0064(11) 0.0135(13) 0.0044(12) 
C16 0.0332(15) 0.0276(13) 0.0285(14) 0.0068(11) 0.0067(12) -0.0015(11) 
C17 0.0312(14) 0.0419(16) 0.0274(13) -0.0004(12) 0.0110(11) -0.0012(12) 
C18 0.0449(19) 0.0317(15) 0.0431(17) -0.0049(13) 0.0027(15) 0.0022(13) 
C19 0.0298(13) 0.0162(11) 0.0307(13) 0.0035(10) 0.0158(11) -0.0008(10) 
C20 0.0267(13) 0.0210(11) 0.0281(13) 0.0000(10) 0.0144(11) -0.0051(10) 
C21 0.0278(14) 0.0220(12) 0.0359(14) 0.0021(10) 0.0196(12) -0.0023(10) 
C22 0.0381(15) 0.0221(11) 0.0340(14) -0.0018(10) 0.0243(13) -0.0073(10) 
C23 0.0334(15) 0.0267(12) 0.0264(13) 0.0032(10) 0.0142(12) -0.0080(11) 
C24 0.0368(15) 0.0221(13) 0.0523(18) 0.0051(12) 0.0209(14) 0.0030(11) 
C25 0.0360(16) 0.0339(14) 0.0318(14) -0.0042(12) 0.0121(12) -0.0092(12) 
C26 0.0362(16) 0.0355(15) 0.0598(19) 0.0111(14) 0.0295(15) 0.0077(13) 
C27 0.066(2) 0.0350(15) 0.0483(18) -0.0122(13) 0.0408(17) -0.0114(15) 
C28 0.0458(18) 0.0461(17) 0.0268(14) 0.0114(12) 0.0085(13) -0.0127(14) 
C29 0.0271(13) 0.0201(11) 0.0255(12) 0.0025(10) 0.0167(11) 0.0031(10) 
C30 0.0240(13) 0.0210(11) 0.0395(15) -0.0081(10) 0.0175(12) -0.0024(10) 
C31 0.0324(15) 0.0223(12) 0.0484(16) -0.0086(11) 0.0257(13) -0.0024(11) 
C32 0.0350(16) 0.0249(13) 0.065(2) -0.0084(13) 0.0307(15) -0.0064(12) 
C33 0.0275(15) 0.0349(15) 0.067(2) -0.0209(15) 0.0224(15) -0.0097(12) 
C34 0.0304(15) 0.0415(16) 0.0443(17) -0.0119(13) 0.0143(13) 0.0016(12) 
C35 0.0263(14) 0.0280(13) 0.0439(16) -0.0063(11) 0.0200(13) 0.0018(11) 
C36 0.053(2) 0.0346(15) 0.0473(18) 0.0003(13) 0.0289(16) -0.0072(14) 
C37 0.0341(15) 0.0417(16) 0.0448(17) 0.0056(13) 0.0177(13) 0.0036(13) 
 
_geom_special_details 
; 
 All esds (except the esd in the dihedral angle between two l.s. planes) 
 are estimated using the full covariance matrix.  The cell esds are taken 
 into account individually in the estimation of esds in distances, angles 
 and torsion angles; correlations between esds in cell parameters are only 
 used when they are defined by crystal symmetry.  An approximate (isotropic) 
 treatment of cell esds is used for estimating esds involving l.s. planes. 
; 
 
loop_ 
 _geom_bond_atom_site_label_1 
 _geom_bond_atom_site_label_2 
 _geom_bond_distance 
 _geom_bond_site_symmetry_2 
 _geom_bond_publ_flag 
Ir1 C29 1.888(2) . ? 
Ir1 C10 2.039(2) . ? 
Ir1 C20 2.240(2) . ? 
Ir1 C22 2.241(2) . ? 
Ir1 C21 2.257(2) . ? 
Ir1 C19 2.278(2) . ? 
Ir1 C23 2.288(2) . ? 
Ir1 P1 2.3952(6) . ? 
P1 C10 1.799(3) . ? 
P1 C1 1.837(2) . ? 
N1 C10 1.267(3) . ? 
N1 C11 1.429(3) . ? 
N2 C29 1.172(3) . ? 
N2 C30 1.398(3) . ? 
C1 C2 1.412(3) . ? 
C1 C6 1.412(3) . ? 
C2 C3 1.389(4) . ? 
C2 C7 1.516(4) . ? 
C3 C4 1.391(4) . ? 
C3 H3 0.9500 . ? 
C4 C5 1.389(4) . ? 
C4 C8 1.509(4) . ? 
C5 C6 1.390(4) . ? 
C5 H5 0.9500 . ? 
C6 C9 1.513(3) . ? 
C7 H7A 0.9800 . ? 
C7 H7B 0.9800 . ? 
C7 H7C 0.9800 . ? 
C8 H8A 0.9800 . ? 
C8 H8B 0.9800 . ? 
C8 H8C 0.9800 . ? 
C9 H9A 0.9800 . ? 
C9 H9B 0.9800 . ? 
C9 H9C 0.9800 . ? 
C11 C16 1.399(4) . ? 
C11 C12 1.399(4) . ? 
C12 C13 1.386(4) . ? 
C12 C17 1.512(4) . ? 
C13 C14 1.388(4) . ? 
C13 H13 0.9500 . ? 
C14 C15 1.376(4) . ? 
C14 H14 0.9500 . ? 
C15 C16 1.398(4) . ? 
C15 H15 0.9500 . ? 
C16 C18 1.505(4) . ? 
C17 H17A 0.9800 . ? 
C17 H17B 0.9800 . ? 
C17 H17C 0.9800 . ? 
C18 H18A 0.9800 . ? 
C18 H18B 0.9800 . ? 
C18 H18C 0.9800 . ? 
C19 C23 1.423(3) . ? 
C19 C20 1.435(3) . ? 
C19 C24 1.499(3) . ? 
C20 C21 1.440(3) . ? 
C20 C25 1.500(3) . ? 
C21 C22 1.422(4) . ? 
C21 C26 1.492(4) . ? 
C22 C23 1.450(4) . ? 
C22 C27 1.509(4) . ? 
C23 C28 1.502(4) . ? 
C24 H24A 0.9800 . ? 
C24 H24B 0.9800 . ? 
C24 H24C 0.9800 . ? 
C25 H25A 0.9800 . ? 
C25 H25B 0.9800 . ? 
C25 H25C 0.9800 . ? 
C26 H26A 0.9800 . ? 
C26 H26B 0.9800 . ? 
C26 H26C 0.9800 . ? 
C27 H27A 0.9800 . ? 
C27 H27B 0.9800 . ? 
C27 H27C 0.9800 . ? 
C28 H28A 0.9800 . ? 
C28 H28B 0.9800 . ? 
C28 H28C 0.9800 . ? 
C30 C35 1.397(4) . ? 
C30 C31 1.401(4) . ? 
C31 C32 1.393(4) . ? 
C31 C36 1.492(4) . ? 
C32 C33 1.373(4) . ? 
C32 H32 0.9500 . ? 
C33 C34 1.384(4) . ? 
C33 H33 0.9500 . ? 
C34 C35 1.388(4) . ? 
C34 H34 0.9500 . ? 
C35 C37 1.505(4) . ? 
C36 H36A 0.9800 . ? 
C36 H36B 0.9800 . ? 
C36 H36C 0.9800 . ? 
C37 H37A 0.9800 . ? 
C37 H37B 0.9800 . ? 
C37 H37C 0.9800 . ? 
 
loop_ 
 _geom_angle_atom_site_label_1 
 _geom_angle_atom_site_label_2 
 _geom_angle_atom_site_label_3 
 _geom_angle 
 _geom_angle_site_symmetry_1 
 _geom_angle_site_symmetry_3 
 _geom_angle_publ_flag 
C29 Ir1 C10 90.37(9) . . ? 
C29 Ir1 C20 162.31(9) . . ? 
C10 Ir1 C20 101.46(9) . . ? 
C29 Ir1 C22 101.39(9) . . ? 
C10 Ir1 C22 147.33(10) . . ? 
C20 Ir1 C22 61.76(9) . . ? 
C29 Ir1 C21 125.64(9) . . ? 
C10 Ir1 C21 112.66(10) . . ? 
C20 Ir1 C21 37.34(9) . . ? 
C22 Ir1 C21 36.87(9) . . ? 
C29 Ir1 C19 141.83(10) . . ? 
C10 Ir1 C19 123.00(9) . . ? 
C20 Ir1 C19 37.03(9) . . ? 
C22 Ir1 C19 61.47(9) . . ? 
C21 Ir1 C19 61.92(9) . . ? 
C29 Ir1 C23 109.05(9) . . ? 
C10 Ir1 C23 159.31(9) . . ? 
C20 Ir1 C23 61.56(9) . . ? 
C22 Ir1 C23 37.33(9) . . ? 
C21 Ir1 C23 61.99(9) . . ? 
C19 Ir1 C23 36.31(9) . . ? 
C29 Ir1 P1 91.80(7) . . ? 
C10 Ir1 P1 47.02(7) . . ? 
C20 Ir1 P1 105.89(6) . . ? 
C22 Ir1 P1 159.08(7) . . ? 
C21 Ir1 P1 140.22(7) . . ? 
C19 Ir1 P1 98.26(6) . . ? 
C23 Ir1 P1 122.77(7) . . ? 
C10 P1 C1 108.31(11) . . ? 
C10 P1 Ir1 56.04(8) . . ? 
C1 P1 Ir1 111.32(7) . . ? 
C10 N1 C11 123.8(2) . . ? 
C29 N2 C30 161.9(2) . . ? 
C2 C1 C6 118.7(2) . . ? 
C2 C1 P1 121.49(19) . . ? 
C6 C1 P1 119.29(18) . . ? 
C3 C2 C1 119.4(2) . . ? 
C3 C2 C7 118.9(2) . . ? 
C1 C2 C7 121.7(2) . . ? 
C2 C3 C4 122.4(2) . . ? 
C2 C3 H3 118.8 . . ? 
C4 C3 H3 118.8 . . ? 
C5 C4 C3 117.4(2) . . ? 
C5 C4 C8 121.7(2) . . ? 
C3 C4 C8 120.9(2) . . ? 
C4 C5 C6 122.4(2) . . ? 
C4 C5 H5 118.8 . . ? 
C6 C5 H5 118.8 . . ? 
C5 C6 C1 119.5(2) . . ? 
C5 C6 C9 119.6(2) . . ? 
C1 C6 C9 121.0(2) . . ? 
C2 C7 H7A 109.5 . . ? 
C2 C7 H7B 109.5 . . ? 
H7A C7 H7B 109.5 . . ? 
C2 C7 H7C 109.5 . . ? 
H7A C7 H7C 109.5 . . ? 
H7B C7 H7C 109.5 . . ? 
C4 C8 H8A 109.5 . . ? 
C4 C8 H8B 109.5 . . ? 
H8A C8 H8B 109.5 . . ? 
C4 C8 H8C 109.5 . . ? 
H8A C8 H8C 109.5 . . ? 
H8B C8 H8C 109.5 . . ? 
C6 C9 H9A 109.5 . . ? 
C6 C9 H9B 109.5 . . ? 
H9A C9 H9B 109.5 . . ? 
C6 C9 H9C 109.5 . . ? 
H9A C9 H9C 109.5 . . ? 
H9B C9 H9C 109.5 . . ? 
N1 C10 P1 137.2(2) . . ? 
N1 C10 Ir1 143.95(19) . . ? 
P1 C10 Ir1 76.94(9) . . ? 
C16 C11 C12 121.1(2) . . ? 
C16 C11 N1 123.9(2) . . ? 
C12 C11 N1 114.8(2) . . ? 
C13 C12 C11 118.7(3) . . ? 
C13 C12 C17 120.6(2) . . ? 
C11 C12 C17 120.7(2) . . ? 
C12 C13 C14 121.2(3) . . ? 
C12 C13 H13 119.4 . . ? 
C14 C13 H13 119.4 . . ? 
C15 C14 C13 119.5(3) . . ? 
C15 C14 H14 120.3 . . ? 
C13 C14 H14 120.3 . . ? 
C14 C15 C16 121.4(3) . . ? 
C14 C15 H15 119.3 . . ? 
C16 C15 H15 119.3 . . ? 
C15 C16 C11 118.2(2) . . ? 
C15 C16 C18 119.6(3) . . ? 
C11 C16 C18 122.2(3) . . ? 
C12 C17 H17A 109.5 . . ? 
C12 C17 H17B 109.5 . . ? 
H17A C17 H17B 109.5 . . ? 
C12 C17 H17C 109.5 . . ? 
H17A C17 H17C 109.5 . . ? 
H17B C17 H17C 109.5 . . ? 
C16 C18 H18A 109.5 . . ? 
C16 C18 H18B 109.5 . . ? 
H18A C18 H18B 109.5 . . ? 
C16 C18 H18C 109.5 . . ? 
H18A C18 H18C 109.5 . . ? 
H18B C18 H18C 109.5 . . ? 
C23 C19 C20 108.3(2) . . ? 
C23 C19 C24 125.8(2) . . ? 
C20 C19 C24 125.9(2) . . ? 
C23 C19 Ir1 72.20(13) . . ? 
C20 C19 Ir1 70.02(13) . . ? 
C24 C19 Ir1 123.12(17) . . ? 
C19 C20 C21 108.5(2) . . ? 
C19 C20 C25 125.7(2) . . ? 
C21 C20 C25 125.2(2) . . ? 
C19 C20 Ir1 72.96(13) . . ? 
C21 C20 Ir1 71.99(13) . . ? 
C25 C20 Ir1 127.41(17) . . ? 
C22 C21 C20 106.9(2) . . ? 
C22 C21 C26 126.7(2) . . ? 
C20 C21 C26 126.3(2) . . ? 
C22 C21 Ir1 70.93(14) . . ? 
C20 C21 Ir1 70.67(13) . . ? 
C26 C21 Ir1 127.21(17) . . ? 
C21 C22 C23 109.1(2) . . ? 
C21 C22 C27 125.9(3) . . ? 
C23 C22 C27 124.7(3) . . ? 
C21 C22 Ir1 72.20(14) . . ? 
C23 C22 Ir1 73.09(13) . . ? 
C27 C22 Ir1 125.19(17) . . ? 
C19 C23 C22 107.0(2) . . ? 
C19 C23 C28 125.9(3) . . ? 
C22 C23 C28 126.9(2) . . ? 
C19 C23 Ir1 71.49(13) . . ? 
C22 C23 Ir1 69.57(13) . . ? 
C28 C23 Ir1 128.57(18) . . ? 
C19 C24 H24A 109.5 . . ? 
C19 C24 H24B 109.5 . . ? 
H24A C24 H24B 109.5 . . ? 
C19 C24 H24C 109.5 . . ? 
H24A C24 H24C 109.5 . . ? 
H24B C24 H24C 109.5 . . ? 
C20 C25 H25A 109.5 . . ? 
C20 C25 H25B 109.5 . . ? 
H25A C25 H25B 109.5 . . ? 
C20 C25 H25C 109.5 . . ? 
H25A C25 H25C 109.5 . . ? 
H25B C25 H25C 109.5 . . ? 
C21 C26 H26A 109.5 . . ? 
C21 C26 H26B 109.5 . . ? 
H26A C26 H26B 109.5 . . ? 
C21 C26 H26C 109.5 . . ? 
H26A C26 H26C 109.5 . . ? 
H26B C26 H26C 109.5 . . ? 
C22 C27 H27A 109.5 . . ? 
C22 C27 H27B 109.5 . . ? 
H27A C27 H27B 109.5 . . ? 
C22 C27 H27C 109.5 . . ? 
H27A C27 H27C 109.5 . . ? 
H27B C27 H27C 109.5 . . ? 
C23 C28 H28A 109.5 . . ? 
C23 C28 H28B 109.5 . . ? 
H28A C28 H28B 109.5 . . ? 
C23 C28 H28C 109.5 . . ? 
H28A C28 H28C 109.5 . . ? 
H28B C28 H28C 109.5 . . ? 
N2 C29 Ir1 179.4(3) . . ? 
C35 C30 N2 118.8(2) . . ? 
C35 C30 C31 122.7(2) . . ? 
N2 C30 C31 118.5(2) . . ? 
C32 C31 C30 117.0(3) . . ? 
C32 C31 C36 121.5(3) . . ? 
C30 C31 C36 121.5(2) . . ? 
C33 C32 C31 121.5(3) . . ? 
C33 C32 H32 119.3 . . ? 
C31 C32 H32 119.3 . . ? 
C32 C33 C34 120.3(3) . . ? 
C32 C33 H33 119.9 . . ? 
C34 C33 H33 119.9 . . ? 
C33 C34 C35 120.9(3) . . ? 
C33 C34 H34 119.6 . . ? 
C35 C34 H34 119.6 . . ? 
C34 C35 C30 117.6(3) . . ? 
C34 C35 C37 121.7(3) . . ? 
C30 C35 C37 120.7(2) . . ? 
C31 C36 H36A 109.5 . . ? 
C31 C36 H36B 109.5 . . ? 
H36A C36 H36B 109.5 . . ? 
C31 C36 H36C 109.5 . . ? 
H36A C36 H36C 109.5 . . ? 
H36B C36 H36C 109.5 . . ? 
C35 C37 H37A 109.5 . . ? 
C35 C37 H37B 109.5 . . ? 
H37A C37 H37B 109.5 . . ? 
C35 C37 H37C 109.5 . . ? 
H37A C37 H37C 109.5 . . ? 
H37B C37 H37C 109.5 . . ? 
 
loop_ 
 _geom_torsion_atom_site_label_1 
 _geom_torsion_atom_site_label_2 
 _geom_torsion_atom_site_label_3 
 _geom_torsion_atom_site_label_4 
 _geom_torsion 
 _geom_torsion_site_symmetry_1 
 _geom_torsion_site_symmetry_2 
 _geom_torsion_site_symmetry_3 
 _geom_torsion_site_symmetry_4 
 _geom_torsion_publ_flag 
C29 Ir1 P1 C10 -88.84(12) . . . . ? 
C20 Ir1 P1 C10 90.98(11) . . . . ? 
C22 Ir1 P1 C10 141.7(2) . . . . ? 
C21 Ir1 P1 C10 72.78(14) . . . . ? 
C19 Ir1 P1 C10 128.09(11) . . . . ? 
C23 Ir1 P1 C10 157.05(12) . . . . ? 
C29 Ir1 P1 C1 9.43(11) . . . . ? 
C10 Ir1 P1 C1 98.26(12) . . . . ? 
C20 Ir1 P1 C1 -170.76(11) . . . . ? 
C22 Ir1 P1 C1 -120.0(2) . . . . ? 
C21 Ir1 P1 C1 171.04(13) . . . . ? 
C19 Ir1 P1 C1 -133.64(11) . . . . ? 
C23 Ir1 P1 C1 -104.69(11) . . . . ? 
C10 P1 C1 C2 -58.4(2) . . . . ? 
Ir1 P1 C1 C2 -118.25(18) . . . . ? 
C10 P1 C1 C6 129.72(19) . . . . ? 
Ir1 P1 C1 C6 69.88(19) . . . . ? 
C6 C1 C2 C3 -4.8(3) . . . . ? 
P1 C1 C2 C3 -176.70(18) . . . . ? 
C6 C1 C2 C7 175.8(2) . . . . ? 
P1 C1 C2 C7 3.9(3) . . . . ? 
C1 C2 C3 C4 0.3(4) . . . . ? 
C7 C2 C3 C4 179.8(2) . . . . ? 
C2 C3 C4 C5 3.4(4) . . . . ? 
C2 C3 C4 C8 -175.9(2) . . . . ? 
C3 C4 C5 C6 -2.8(4) . . . . ? 
C8 C4 C5 C6 176.6(2) . . . . ? 
C4 C5 C6 C1 -1.6(4) . . . . ? 
C4 C5 C6 C9 178.1(2) . . . . ? 
C2 C1 C6 C5 5.4(3) . . . . ? 
P1 C1 C6 C5 177.50(18) . . . . ? 
C2 C1 C6 C9 -174.3(2) . . . . ? 
P1 C1 C6 C9 -2.2(3) . . . . ? 
C11 N1 C10 P1 160.8(2) . . . . ? 
C11 N1 C10 Ir1 3.9(5) . . . . ? 
C1 P1 C10 N1 89.9(3) . . . . ? 
Ir1 P1 C10 N1 -166.3(3) . . . . ? 
C1 P1 C10 Ir1 -103.82(9) . . . . ? 
C29 Ir1 C10 N1 -103.7(3) . . . . ? 
C20 Ir1 C10 N1 63.0(3) . . . . ? 
C22 Ir1 C10 N1 8.4(4) . . . . ? 
C21 Ir1 C10 N1 25.6(3) . . . . ? 
C19 Ir1 C10 N1 95.9(3) . . . . ? 
C23 Ir1 C10 N1 96.1(4) . . . . ? 
P1 Ir1 C10 N1 164.2(4) . . . . ? 
C29 Ir1 C10 P1 92.11(10) . . . . ? 
C20 Ir1 C10 P1 -101.13(9) . . . . ? 
C22 Ir1 C10 P1 -155.80(13) . . . . ? 
C21 Ir1 C10 P1 -138.52(8) . . . . ? 
C19 Ir1 C10 P1 -68.22(12) . . . . ? 
C23 Ir1 C10 P1 -68.1(3) . . . . ? 
C10 N1 C11 C16 67.2(3) . . . . ? 
C10 N1 C11 C12 -118.6(3) . . . . ? 
C16 C11 C12 C13 -2.8(4) . . . . ? 
N1 C11 C12 C13 -177.1(2) . . . . ? 
C16 C11 C12 C17 176.3(2) . . . . ? 
N1 C11 C12 C17 2.0(3) . . . . ? 
C11 C12 C13 C14 1.4(4) . . . . ? 
C17 C12 C13 C14 -177.8(2) . . . . ? 
C12 C13 C14 C15 0.4(4) . . . . ? 
C13 C14 C15 C16 -0.8(4) . . . . ? 
C14 C15 C16 C11 -0.6(4) . . . . ? 
C14 C15 C16 C18 178.0(3) . . . . ? 
C12 C11 C16 C15 2.4(4) . . . . ? 
N1 C11 C16 C15 176.2(2) . . . . ? 
C12 C11 C16 C18 -176.1(2) . . . . ? 
N1 C11 C16 C18 -2.3(4) . . . . ? 
C29 Ir1 C19 C23 32.9(2) . . . . ? 
C10 Ir1 C19 C23 179.92(15) . . . . ? 
C20 Ir1 C19 C23 -117.9(2) . . . . ? 
C22 Ir1 C19 C23 -37.94(15) . . . . ? 
C21 Ir1 C19 C23 -80.04(16) . . . . ? 
P1 Ir1 C19 C23 136.57(14) . . . . ? 
C29 Ir1 C19 C20 150.86(16) . . . . ? 
C10 Ir1 C19 C20 -62.14(17) . . . . ? 
C22 Ir1 C19 C20 79.99(15) . . . . ? 
C21 Ir1 C19 C20 37.90(14) . . . . ? 
C23 Ir1 C19 C20 117.9(2) . . . . ? 
P1 Ir1 C19 C20 -105.49(13) . . . . ? 
C29 Ir1 C19 C24 -88.7(3) . . . . ? 
C10 Ir1 C19 C24 58.3(2) . . . . ? 
C20 Ir1 C19 C24 120.5(3) . . . . ? 
C22 Ir1 C19 C24 -159.5(3) . . . . ? 
C21 Ir1 C19 C24 158.4(2) . . . . ? 
C23 Ir1 C19 C24 -121.6(3) . . . . ? 
P1 Ir1 C19 C24 15.0(2) . . . . ? 
C23 C19 C20 C21 -1.3(3) . . . . ? 
C24 C19 C20 C21 179.3(2) . . . . ? 
Ir1 C19 C20 C21 -63.66(16) . . . . ? 
C23 C19 C20 C25 -173.4(2) . . . . ? 
C24 C19 C20 C25 7.2(4) . . . . ? 
Ir1 C19 C20 C25 124.2(2) . . . . ? 
C23 C19 C20 Ir1 62.40(16) . . . . ? 
C24 C19 C20 Ir1 -117.0(2) . . . . ? 
C29 Ir1 C20 C19 -98.0(3) . . . . ? 
C10 Ir1 C20 C19 130.84(14) . . . . ? 
C22 Ir1 C20 C19 -79.16(15) . . . . ? 
C21 Ir1 C20 C19 -116.7(2) . . . . ? 
C23 Ir1 C20 C19 -36.51(14) . . . . ? 
P1 Ir1 C20 C19 82.56(13) . . . . ? 
C29 Ir1 C20 C21 18.6(4) . . . . ? 
C10 Ir1 C20 C21 -112.48(15) . . . . ? 
C22 Ir1 C20 C21 37.53(14) . . . . ? 
C19 Ir1 C20 C21 116.7(2) . . . . ? 
C23 Ir1 C20 C21 80.17(16) . . . . ? 
P1 Ir1 C20 C21 -160.76(13) . . . . ? 
C29 Ir1 C20 C25 139.6(3) . . . . ? 
C10 Ir1 C20 C25 8.5(2) . . . . ? 
C22 Ir1 C20 C25 158.5(3) . . . . ? 
C21 Ir1 C20 C25 121.0(3) . . . . ? 
C19 Ir1 C20 C25 -122.3(3) . . . . ? 
C23 Ir1 C20 C25 -158.8(3) . . . . ? 
P1 Ir1 C20 C25 -39.8(2) . . . . ? 
C19 C20 C21 C22 2.2(3) . . . . ? 
C25 C20 C21 C22 174.4(2) . . . . ? 
Ir1 C20 C21 C22 -62.06(16) . . . . ? 
C19 C20 C21 C26 -173.2(2) . . . . ? 
C25 C20 C21 C26 -1.0(4) . . . . ? 
Ir1 C20 C21 C26 122.5(2) . . . . ? 
C19 C20 C21 Ir1 64.28(16) . . . . ? 
C25 C20 C21 Ir1 -123.5(2) . . . . ? 
C29 Ir1 C21 C22 -56.56(18) . . . . ? 
C10 Ir1 C21 C22 -164.51(14) . . . . ? 
C20 Ir1 C21 C22 116.6(2) . . . . ? 
C19 Ir1 C21 C22 79.00(15) . . . . ? 
C23 Ir1 C21 C22 37.65(14) . . . . ? 
P1 Ir1 C21 C22 146.27(12) . . . . ? 
C29 Ir1 C21 C20 -173.13(14) . . . . ? 
C10 Ir1 C21 C20 78.92(16) . . . . ? 
C22 Ir1 C21 C20 -116.6(2) . . . . ? 
C19 Ir1 C21 C20 -37.58(14) . . . . ? 
C23 Ir1 C21 C20 -78.93(15) . . . . ? 
P1 Ir1 C21 C20 29.69(19) . . . . ? 
C29 Ir1 C21 C26 65.5(3) . . . . ? 
C10 Ir1 C21 C26 -42.5(3) . . . . ? 
C20 Ir1 C21 C26 -121.4(3) . . . . ? 
C22 Ir1 C21 C26 122.1(3) . . . . ? 
C19 Ir1 C21 C26 -158.9(3) . . . . ? 
C23 Ir1 C21 C26 159.7(3) . . . . ? 
P1 Ir1 C21 C26 -91.7(2) . . . . ? 
C20 C21 C22 C23 -2.3(3) . . . . ? 
C26 C21 C22 C23 173.1(2) . . . . ? 
Ir1 C21 C22 C23 -64.23(16) . . . . ? 
C20 C21 C22 C27 -177.1(2) . . . . ? 
C26 C21 C22 C27 -1.7(4) . . . . ? 
Ir1 C21 C22 C27 121.0(2) . . . . ? 
C20 C21 C22 Ir1 61.89(16) . . . . ? 
C26 C21 C22 Ir1 -122.7(2) . . . . ? 
C29 Ir1 C22 C21 136.23(15) . . . . ? 
C10 Ir1 C22 C21 27.2(2) . . . . ? 
C20 Ir1 C22 C21 -38.01(14) . . . . ? 
C19 Ir1 C22 C21 -80.32(15) . . . . ? 
C23 Ir1 C22 C21 -117.2(2) . . . . ? 
P1 Ir1 C22 C21 -95.7(2) . . . . ? 
C29 Ir1 C22 C23 -106.55(15) . . . . ? 
C10 Ir1 C22 C23 144.39(17) . . . . ? 
C20 Ir1 C22 C23 79.21(15) . . . . ? 
C21 Ir1 C22 C23 117.2(2) . . . . ? 
C19 Ir1 C22 C23 36.90(14) . . . . ? 
P1 Ir1 C22 C23 21.5(3) . . . . ? 
C29 Ir1 C22 C27 14.4(3) . . . . ? 
C10 Ir1 C22 C27 -94.6(3) . . . . ? 
C20 Ir1 C22 C27 -159.8(3) . . . . ? 
C21 Ir1 C22 C27 -121.8(3) . . . . ? 
C19 Ir1 C22 C27 157.9(3) . . . . ? 
C23 Ir1 C22 C27 121.0(3) . . . . ? 
P1 Ir1 C22 C27 142.5(2) . . . . ? 
C20 C19 C23 C22 -0.2(3) . . . . ? 
C24 C19 C23 C22 179.2(2) . . . . ? 
Ir1 C19 C23 C22 60.82(16) . . . . ? 
C20 C19 C23 C28 174.3(2) . . . . ? 
C24 C19 C23 C28 -6.3(4) . . . . ? 
Ir1 C19 C23 C28 -124.7(3) . . . . ? 
C20 C19 C23 Ir1 -61.01(16) . . . . ? 
C24 C19 C23 Ir1 118.4(2) . . . . ? 
C21 C22 C23 C19 1.6(3) . . . . ? 
C27 C22 C23 C19 176.4(2) . . . . ? 
Ir1 C22 C23 C19 -62.07(16) . . . . ? 
C21 C22 C23 C28 -172.8(2) . . . . ? 
C27 C22 C23 C28 2.0(4) . . . . ? 
Ir1 C22 C23 C28 123.5(3) . . . . ? 
C21 C22 C23 Ir1 63.66(16) . . . . ? 
C27 C22 C23 Ir1 -121.5(2) . . . . ? 
C29 Ir1 C23 C19 -159.19(15) . . . . ? 
C10 Ir1 C23 C19 -0.2(4) . . . . ? 
C20 Ir1 C23 C19 37.23(14) . . . . ? 
C22 Ir1 C23 C19 117.0(2) . . . . ? 
C21 Ir1 C23 C19 79.84(16) . . . . ? 
P1 Ir1 C23 C19 -54.01(16) . . . . ? 
C29 Ir1 C23 C22 83.79(16) . . . . ? 
C10 Ir1 C23 C22 -117.2(3) . . . . ? 
C20 Ir1 C23 C22 -79.79(16) . . . . ? 
C21 Ir1 C23 C22 -37.18(14) . . . . ? 
C19 Ir1 C23 C22 -117.0(2) . . . . ? 
P1 Ir1 C23 C22 -171.04(12) . . . . ? 
C29 Ir1 C23 C28 -37.6(3) . . . . ? 
C10 Ir1 C23 C28 121.4(3) . . . . ? 
C20 Ir1 C23 C28 158.8(3) . . . . ? 
C22 Ir1 C23 C28 -121.4(3) . . . . ? 
C21 Ir1 C23 C28 -158.6(3) . . . . ? 
C19 Ir1 C23 C28 121.5(3) . . . . ? 
P1 Ir1 C23 C28 67.5(3) . . . . ? 
C29 N2 C30 C35 -62.8(8) . . . . ? 
C29 N2 C30 C31 116.5(8) . . . . ? 
C35 C30 C31 C32 2.7(4) . . . . ? 
N2 C30 C31 C32 -176.5(2) . . . . ? 
C35 C30 C31 C36 -177.0(2) . . . . ? 
N2 C30 C31 C36 3.8(4) . . . . ? 
C30 C31 C32 C33 -1.6(4) . . . . ? 
C36 C31 C32 C33 178.1(3) . . . . ? 
C31 C32 C33 C34 -0.3(4) . . . . ? 
C32 C33 C34 C35 1.4(4) . . . . ? 
C33 C34 C35 C30 -0.3(4) . . . . ? 
C33 C34 C35 C37 179.0(2) . . . . ? 
N2 C30 C35 C34 177.5(2) . . . . ? 
C31 C30 C35 C34 -1.8(4) . . . . ? 
N2 C30 C35 C37 -1.9(3) . . . . ? 
C31 C30 C35 C37 178.9(2) . . . . ? 
 
_diffrn_measured_fraction_theta_max    1.000 
_diffrn_reflns_theta_full              27.50 
_diffrn_measured_fraction_theta_full   1.000 
_refine_diff_density_max    1.353 
_refine_diff_density_min   -0.924 
_refine_diff_density_rms    0.077 


#===END

 
data_s3826a 
 
_audit_creation_method            SHELXL-97 
_chemical_name_systematic 
; 
 ? 
; 
_chemical_name_common             ? 
_chemical_melting_point           ? 
_chemical_formula_moiety
 'C44 H58 Ir N2 P'
_chemical_formula_sum 
 'C44 H58 Ir N2 P' 
_chemical_formula_weight          838.09 
 
loop_ 
 _atom_type_symbol 
 _atom_type_description 
 _atom_type_scat_dispersion_real 
 _atom_type_scat_dispersion_imag 
 _atom_type_scat_source 
 'C'  'C'   0.0033   0.0016 
 'International Tables Vol C Tables 4.2.6.8 and 6.1.1.4' 
 'H'  'H'   0.0000   0.0000 
 'International Tables Vol C Tables 4.2.6.8 and 6.1.1.4' 
 'Ir'  'Ir'  -1.4442   7.9887 
 'International Tables Vol C Tables 4.2.6.8 and 6.1.1.4' 
 'N'  'N'   0.0061   0.0033 
 'International Tables Vol C Tables 4.2.6.8 and 6.1.1.4' 
 'P'  'P'   0.1023   0.0942 
 'International Tables Vol C Tables 4.2.6.8 and 6.1.1.4' 
 
_symmetry_cell_setting            monoclinic
_symmetry_space_group_name_H-M    'P 21/c'
_symmetry_space_group_name_Hall   '-P 2ybc'
 
loop_ 
 _symmetry_equiv_pos_as_xyz 
 'x, y, z' 
 '-x, y+1/2, -z+1/2' 
 '-x, -y, -z' 
 'x, -y-1/2, z-1/2' 
 
_cell_length_a                    11.8029(1) 
_cell_length_b                    16.4042(1) 
_cell_length_c                    20.8175(2) 
_cell_angle_alpha                 90.00 
_cell_angle_beta                  96.7501(3) 
_cell_angle_gamma                 90.00 
_cell_volume                      4002.68(6) 
_cell_formula_units_Z             4 
_cell_measurement_temperature     150(2) 
_cell_measurement_reflns_used     94293
_cell_measurement_theta_min       1.02 
_cell_measurement_theta_max       27.48
 
_exptl_crystal_description        needle
_exptl_crystal_colour             yellow
_exptl_crystal_size_max           0.27
_exptl_crystal_size_mid           0.04
_exptl_crystal_size_min           0.04
_exptl_crystal_density_meas       ? 
_exptl_crystal_density_diffrn     1.391 
_exptl_crystal_density_method     'not measured' 
_exptl_crystal_F_000              1712 
_exptl_absorpt_coefficient_mu     3.407 
_exptl_absorpt_correction_type    'multi-scan'
_exptl_absorpt_correction_T_min   0.47
_exptl_absorpt_correction_T_max   0.87
_exptl_absorpt_process_details    ? 
 
_exptl_special_details 
; 
 ? 
; 
 
_diffrn_ambient_temperature       150(2) 
_diffrn_radiation_wavelength      0.71073 
_diffrn_radiation_type            MoK\a 
_diffrn_radiation_source          'rotating anode' 
_diffrn_radiation_monochromator   graphite 
_diffrn_measurement_device_type   'Nonius KappaCCD'
_diffrn_measurement_method        '\f and \w scans' 
_diffrn_detector_area_resol_mean  ? 
_diffrn_standards_number          ? 
_diffrn_standards_interval_count  ? 
_diffrn_standards_interval_time   ? 
_diffrn_standards_decay_%         ? 
_diffrn_reflns_number             82096 
_diffrn_reflns_av_R_equivalents   0.0446 
_diffrn_reflns_av_sigmaI/netI     0.0272 
_diffrn_reflns_limit_h_min        -15 
_diffrn_reflns_limit_h_max        15 
_diffrn_reflns_limit_k_min        -20 
_diffrn_reflns_limit_k_max        21 
_diffrn_reflns_limit_l_min        -27 
_diffrn_reflns_limit_l_max        27 
_diffrn_reflns_theta_min          1.58 
_diffrn_reflns_theta_max          27.48 
_reflns_number_total              9159 
_reflns_number_gt                 7705 
_reflns_threshold_expression      'I>2\s(I)'
 
_computing_data_collection        'Nonius COLLECT'
_computing_cell_refinement        'HKL2000'
_computing_data_reduction         'HKL2000, denzox, sadabs'
_computing_structure_solution     'DIRDIF-99 (Beurskens et al., 1999)' 
_computing_structure_refinement   'SHELXL-97 (Sheldrick, 1997)' 
_computing_molecular_graphics     ? 
_computing_publication_material   ? 
 
_refine_special_details 
; 
 Refinement of F^2^ against ALL reflections.  The weighted R-factor wR and 
 goodness of fit S are based on F^2^, conventional R-factors R are based 
 on F, with F set to zero for negative F^2^. The threshold expression of 
 F^2^ > 2sigma(F^2^) is used only for calculating R-factors(gt) etc. and is 
 not relevant to the choice of reflections for refinement.  R-factors based 
 on F^2^ are statistically about twice as large as those based on F, and R- 
 factors based on ALL data will be even larger. 
; 
 
_refine_ls_structure_factor_coef  Fsqd  
_refine_ls_matrix_type            full 
_refine_ls_weighting_scheme       calc  
_refine_ls_weighting_details 
 'calc w=1/[\s^2^(Fo^2^)+(0.0129P)^2^+3.6855P] where P=(Fo^2^+2Fc^2^)/3' 
_atom_sites_solution_primary      heavy 
_atom_sites_solution_secondary    difmap 
_atom_sites_solution_hydrogens    difmap 
_refine_ls_hydrogen_treatment     constr
_refine_ls_extinction_method      none 
_refine_ls_extinction_coef        ? 
_refine_ls_number_reflns          9159 
_refine_ls_number_parameters      449 
_refine_ls_number_restraints      0 
_refine_ls_R_factor_all           0.0334 
_refine_ls_R_factor_gt            0.0222 
_refine_ls_wR_factor_ref          0.0455 
_refine_ls_wR_factor_gt           0.0426 
_refine_ls_goodness_of_fit_ref    1.043 
_refine_ls_restrained_S_all       1.043 
_refine_ls_shift/su_max           0.004 
_refine_ls_shift/su_mean          0.000 
 
loop_ 
 _atom_site_label 
 _atom_site_type_symbol 
 _atom_site_fract_x 
 _atom_site_fract_y 
 _atom_site_fract_z 
 _atom_site_U_iso_or_equiv 
 _atom_site_adp_type 
 _atom_site_occupancy 
 _atom_site_symmetry_multiplicity 
 _atom_site_calc_flag 
 _atom_site_refinement_flags 
 _atom_site_disorder_assembly 
 _atom_site_disorder_group 
Ir1 Ir 0.102025(7) 0.197422(5) 0.125775(4) 0.02028(3) Uani 1 1 d . . . 
P1 P 0.26818(5) 0.20942(3) 0.20423(3) 0.02173(13) Uani 1 1 d . . . 
N1 N 0.07683(17) 0.27366(12) 0.26109(10) 0.0267(4) Uani 1 1 d . . . 
N2 N 0.12374(17) 0.36538(12) 0.06419(10) 0.0267(5) Uani 1 1 d . . . 
C1 C 0.35863(19) 0.30152(13) 0.19389(11) 0.0206(5) Uani 1 1 d . . . 
C2 C 0.36858(19) 0.36592(14) 0.24006(11) 0.0229(5) Uani 1 1 d . . . 
C3 C 0.4093(2) 0.44127(14) 0.22110(12) 0.0266(5) Uani 1 1 d . . . 
H3 H 0.4117 0.4851 0.2511 0.032 Uiso 1 1 calc R . . 
C4 C 0.4462(2) 0.45600(14) 0.16155(12) 0.0235(5) Uani 1 1 d . . . 
C5 C 0.45399(19) 0.38809(13) 0.12212(11) 0.0233(5) Uani 1 1 d . . . 
H5 H 0.4861 0.3950 0.0827 0.028 Uiso 1 1 calc R . . 
C6 C 0.41693(19) 0.31025(13) 0.13751(11) 0.0209(5) Uani 1 1 d . . . 
C7 C 0.3500(2) 0.36284(15) 0.31276(12) 0.0288(6) Uani 1 1 d . . . 
C8 C 0.2523(3) 0.42053(16) 0.32556(14) 0.0424(7) Uani 1 1 d . . . 
H8A H 0.1805 0.4007 0.3025 0.064 Uiso 1 1 calc R . . 
H8B H 0.2682 0.4754 0.3103 0.064 Uiso 1 1 calc R . . 
H8C H 0.2461 0.4222 0.3721 0.064 Uiso 1 1 calc R . . 
C9 C 0.4618(3) 0.39294(19) 0.35246(13) 0.0479(8) Uani 1 1 d . . . 
H9A H 0.4534 0.3907 0.3987 0.072 Uiso 1 1 calc R . . 
H9B H 0.4772 0.4492 0.3402 0.072 Uiso 1 1 calc R . . 
H9C H 0.5253 0.3579 0.3435 0.072 Uiso 1 1 calc R . . 
C10 C 0.3279(2) 0.27881(15) 0.34024(12) 0.0299(6) Uani 1 1 d . . . 
H10A H 0.2519 0.2599 0.3225 0.045 Uiso 1 1 calc R . . 
H10B H 0.3322 0.2822 0.3875 0.045 Uiso 1 1 calc R . . 
H10C H 0.3855 0.2403 0.3284 0.045 Uiso 1 1 calc R . . 
C11 C 0.4923(2) 0.54011(14) 0.14594(12) 0.0278(5) Uani 1 1 d . . . 
C12 C 0.4184(2) 0.60824(15) 0.16873(15) 0.0387(7) Uani 1 1 d . . . 
H12A H 0.4483 0.6611 0.1568 0.058 Uiso 1 1 calc R . . 
H12B H 0.4197 0.6054 0.2158 0.058 Uiso 1 1 calc R . . 
H12C H 0.3398 0.6019 0.1482 0.058 Uiso 1 1 calc R . . 
C13 C 0.4992(3) 0.55160(18) 0.07404(15) 0.0557(9) Uani 1 1 d . . . 
H13A H 0.4235 0.5433 0.0501 0.084 Uiso 1 1 calc R . . 
H13B H 0.5527 0.5119 0.0595 0.084 Uiso 1 1 calc R . . 
H13C H 0.5257 0.6069 0.0662 0.084 Uiso 1 1 calc R . . 
C14 C 0.6130(2) 0.54733(17) 0.18245(17) 0.0463(8) Uani 1 1 d . . . 
H14A H 0.6609 0.5032 0.1689 0.069 Uiso 1 1 calc R . . 
H14B H 0.6089 0.5434 0.2291 0.069 Uiso 1 1 calc R . . 
H14C H 0.6461 0.6000 0.1726 0.069 Uiso 1 1 calc R . . 
C15 C 0.4521(2) 0.23892(14) 0.09431(12) 0.0263(5) Uani 1 1 d . . . 
C16 C 0.3626(3) 0.2233(3) 0.03688(17) 0.0778(14) Uani 1 1 d . . . 
H16A H 0.3904 0.1815 0.0090 0.117 Uiso 1 1 calc R . . 
H16B H 0.3479 0.2739 0.0122 0.117 Uiso 1 1 calc R . . 
H16C H 0.2918 0.2046 0.0524 0.117 Uiso 1 1 calc R . . 
C17 C 0.5632(2) 0.25931(17) 0.06600(16) 0.0425(7) Uani 1 1 d . . . 
H17A H 0.6229 0.2729 0.1012 0.064 Uiso 1 1 calc R . . 
H17B H 0.5504 0.3060 0.0366 0.064 Uiso 1 1 calc R . . 
H17C H 0.5873 0.2121 0.0421 0.064 Uiso 1 1 calc R . . 
C18 C 0.4802(4) 0.16160(19) 0.13353(19) 0.0788(14) Uani 1 1 d . . . 
H18A H 0.4105 0.1401 0.1486 0.118 Uiso 1 1 calc R . . 
H18B H 0.5360 0.1742 0.1709 0.118 Uiso 1 1 calc R . . 
H18C H 0.5121 0.1208 0.1063 0.118 Uiso 1 1 calc R . . 
C19 C 0.12871(19) 0.24703(13) 0.21556(11) 0.0213(5) Uani 1 1 d . . . 
C20 C -0.0424(2) 0.29024(14) 0.25403(12) 0.0253(5) Uani 1 1 d . . . 
C21 C -0.1034(2) 0.26676(17) 0.30436(13) 0.0348(6) Uani 1 1 d . . . 
H21 H -0.0651 0.2402 0.3413 0.042 Uiso 1 1 calc R . . 
C22 C -0.2196(2) 0.28198(18) 0.30095(14) 0.0405(7) Uani 1 1 d . . . 
H22 H -0.2608 0.2645 0.3350 0.049 Uiso 1 1 calc R . . 
C23 C -0.2758(2) 0.32240(16) 0.24838(14) 0.0350(6) Uani 1 1 d . . . 
H23 H -0.3554 0.3328 0.2460 0.042 Uiso 1 1 calc R . . 
C24 C -0.2146(2) 0.34768(15) 0.19906(13) 0.0305(6) Uani 1 1 d . . . 
H24 H -0.2526 0.3762 0.1631 0.037 Uiso 1 1 calc R . . 
C25 C -0.0990(2) 0.33203(14) 0.20153(12) 0.0264(5) Uani 1 1 d . . . 
H25 H -0.0583 0.3498 0.1674 0.032 Uiso 1 1 calc R . . 
C26 C -0.0306(2) 0.13594(15) 0.05538(13) 0.0330(6) Uani 1 1 d . . . 
C27 C -0.0574(2) 0.12036(14) 0.11914(13) 0.0290(6) Uani 1 1 d . . . 
C28 C 0.0365(2) 0.07534(13) 0.15191(12) 0.0272(5) Uani 1 1 d . . . 
C29 C 0.1163(2) 0.05926(14) 0.10674(14) 0.0321(6) Uani 1 1 d . . . 
C30 C 0.0760(2) 0.09665(15) 0.04731(13) 0.0353(6) Uani 1 1 d . . . 
C31 C -0.1078(3) 0.17702(19) 0.00239(17) 0.0610(11) Uani 1 1 d . . . 
H31A H -0.1546 0.1359 -0.0224 0.091 Uiso 1 1 calc R . . 
H31B H -0.0615 0.2061 -0.0264 0.091 Uiso 1 1 calc R . . 
H31C H -0.1574 0.2158 0.0214 0.091 Uiso 1 1 calc R . . 
C32 C -0.1681(2) 0.13960(17) 0.14461(18) 0.0486(8) Uani 1 1 d . . . 
H32A H -0.1976 0.1917 0.1267 0.073 Uiso 1 1 calc R . . 
H32B H -0.1556 0.1433 0.1919 0.073 Uiso 1 1 calc R . . 
H32C H -0.2235 0.0963 0.1319 0.073 Uiso 1 1 calc R . . 
C33 C 0.0448(3) 0.04265(17) 0.21962(14) 0.0478(8) Uani 1 1 d . . . 
H33A H 0.0002 0.0772 0.2457 0.072 Uiso 1 1 calc R . . 
H33B H 0.1248 0.0425 0.2386 0.072 Uiso 1 1 calc R . . 
H33C H 0.0148 -0.0131 0.2188 0.072 Uiso 1 1 calc R . . 
C34 C 0.2218(3) 0.00820(17) 0.12132(19) 0.0566(10) Uani 1 1 d . . . 
H34A H 0.2000 -0.0489 0.1264 0.085 Uiso 1 1 calc R . . 
H34B H 0.2654 0.0274 0.1614 0.085 Uiso 1 1 calc R . . 
H34C H 0.2688 0.0128 0.0857 0.085 Uiso 1 1 calc R . . 
C35 C 0.1266(3) 0.0898(2) -0.01586(16) 0.0625(10) Uani 1 1 d . . . 
H35A H 0.2082 0.0775 -0.0071 0.094 Uiso 1 1 calc R . . 
H35B H 0.1163 0.1414 -0.0395 0.094 Uiso 1 1 calc R . . 
H35C H 0.0881 0.0460 -0.0420 0.094 Uiso 1 1 calc R . . 
C36 C 0.11714(19) 0.30144(14) 0.08812(11) 0.0213(5) Uani 1 1 d . . . 
C37 C 0.13813(19) 0.43966(14) 0.03342(12) 0.0236(5) Uani 1 1 d . . . 
C38 C 0.1419(2) 0.51083(14) 0.07091(12) 0.0257(5) Uani 1 1 d . . . 
C39 C 0.1567(2) 0.58415(15) 0.03926(13) 0.0317(6) Uani 1 1 d . . . 
H39 H 0.1604 0.6336 0.0632 0.038 Uiso 1 1 calc R . . 
C40 C 0.1662(2) 0.58640(16) -0.02643(13) 0.0339(6) Uani 1 1 d . . . 
H40 H 0.1766 0.6371 -0.0470 0.041 Uiso 1 1 calc R . . 
C41 C 0.1606(2) 0.51523(15) -0.06206(13) 0.0305(6) Uani 1 1 d . . . 
H41 H 0.1666 0.5176 -0.1071 0.037 Uiso 1 1 calc R . . 
C42 C 0.1464(2) 0.44000(14) -0.03291(12) 0.0265(5) Uani 1 1 d . . . 
C43 C 0.1376(2) 0.36265(16) -0.07186(13) 0.0376(6) Uani 1 1 d . . . 
H43A H 0.2038 0.3280 -0.0585 0.056 Uiso 1 1 calc R . . 
H43B H 0.1355 0.3758 -0.1179 0.056 Uiso 1 1 calc R . . 
H43C H 0.0676 0.3336 -0.0646 0.056 Uiso 1 1 calc R . . 
C44 C 0.1285(2) 0.50688(17) 0.14175(13) 0.0349(6) Uani 1 1 d . . . 
H44A H 0.0534 0.4844 0.1473 0.052 Uiso 1 1 calc R . . 
H44B H 0.1354 0.5618 0.1603 0.052 Uiso 1 1 calc R . . 
H44C H 0.1881 0.4719 0.1638 0.052 Uiso 1 1 calc R . . 
 
loop_ 
 _atom_site_aniso_label 
 _atom_site_aniso_U_11 
 _atom_site_aniso_U_22 
 _atom_site_aniso_U_33 
 _atom_site_aniso_U_23 
 _atom_site_aniso_U_13 
 _atom_site_aniso_U_12 
Ir1 0.02454(5) 0.01644(5) 0.01988(5) 0.00055(4) 0.00272(3) -0.00330(4) 
P1 0.0242(3) 0.0192(3) 0.0217(3) 0.0012(2) 0.0022(2) -0.0007(2) 
N1 0.0261(11) 0.0315(11) 0.0224(11) 0.0000(9) 0.0028(9) -0.0006(9) 
N2 0.0293(11) 0.0225(10) 0.0276(12) 0.0077(9) 0.0007(9) -0.0027(8) 
C1 0.0201(11) 0.0186(10) 0.0226(12) 0.0009(9) 0.0003(9) 0.0008(9) 
C2 0.0228(12) 0.0239(12) 0.0220(12) -0.0027(10) 0.0030(10) 0.0009(9) 
C3 0.0310(14) 0.0223(12) 0.0268(13) -0.0057(10) 0.0053(11) -0.0014(10) 
C4 0.0242(12) 0.0222(12) 0.0239(13) 0.0003(10) 0.0018(10) -0.0016(9) 
C5 0.0245(12) 0.0257(12) 0.0195(12) 0.0008(9) 0.0019(9) -0.0045(9) 
C6 0.0205(11) 0.0226(11) 0.0185(11) -0.0023(9) -0.0018(9) -0.0006(9) 
C7 0.0389(15) 0.0290(13) 0.0194(13) -0.0041(10) 0.0074(11) -0.0051(11) 
C8 0.064(2) 0.0293(14) 0.0393(17) -0.0052(12) 0.0276(15) 0.0021(13) 
C9 0.061(2) 0.059(2) 0.0236(15) -0.0046(14) 0.0026(13) -0.0256(16) 
C10 0.0355(14) 0.0333(13) 0.0205(13) 0.0004(10) 0.0017(11) -0.0011(11) 
C11 0.0301(14) 0.0219(12) 0.0316(14) -0.0003(10) 0.0051(11) -0.0028(10) 
C12 0.0352(15) 0.0227(13) 0.059(2) 0.0028(12) 0.0077(13) -0.0007(11) 
C13 0.094(3) 0.0340(16) 0.0411(19) 0.0034(14) 0.0156(18) -0.0188(17) 
C14 0.0347(16) 0.0275(14) 0.076(2) -0.0006(15) 0.0018(15) -0.0055(12) 
C15 0.0290(13) 0.0261(12) 0.0246(13) -0.0061(10) 0.0065(10) -0.0029(10) 
C16 0.0318(17) 0.140(4) 0.060(2) -0.074(2) 0.0011(16) 0.003(2) 
C17 0.0356(16) 0.0382(16) 0.057(2) -0.0136(14) 0.0188(14) 0.0013(12) 
C18 0.135(4) 0.0322(17) 0.084(3) 0.0148(18) 0.076(3) 0.031(2) 
C19 0.0252(12) 0.0179(11) 0.0205(12) 0.0028(9) 0.0019(10) -0.0029(9) 
C20 0.0254(12) 0.0260(13) 0.0248(13) -0.0030(10) 0.0047(10) -0.0002(10) 
C21 0.0345(15) 0.0433(15) 0.0280(14) 0.0056(12) 0.0092(12) 0.0021(12) 
C22 0.0358(16) 0.0497(17) 0.0387(17) 0.0050(13) 0.0162(13) 0.0003(13) 
C23 0.0265(14) 0.0361(15) 0.0435(17) -0.0015(12) 0.0085(12) 0.0022(11) 
C24 0.0339(14) 0.0243(13) 0.0332(15) 0.0009(11) 0.0036(11) 0.0028(11) 
C25 0.0281(13) 0.0253(12) 0.0269(14) 0.0013(10) 0.0072(11) -0.0022(10) 
C26 0.0422(16) 0.0217(12) 0.0315(15) 0.0016(11) -0.0109(12) -0.0121(11) 
C27 0.0275(13) 0.0194(12) 0.0397(16) -0.0005(11) 0.0021(11) -0.0087(10) 
C28 0.0340(14) 0.0160(11) 0.0312(14) 0.0027(10) 0.0020(11) -0.0094(10) 
C29 0.0338(15) 0.0182(12) 0.0445(17) -0.0078(11) 0.0050(12) -0.0051(10) 
C30 0.0500(17) 0.0260(13) 0.0313(15) -0.0099(11) 0.0099(12) -0.0175(12) 
C31 0.083(3) 0.0385(17) 0.052(2) 0.0097(15) -0.0324(19) -0.0187(17) 
C32 0.0320(16) 0.0317(15) 0.084(3) -0.0089(15) 0.0132(16) -0.0105(12) 
C33 0.068(2) 0.0359(16) 0.0383(17) 0.0123(13) 0.0027(15) -0.0165(15) 
C34 0.0433(18) 0.0282(15) 0.096(3) -0.0182(17) -0.0034(18) 0.0044(13) 
C35 0.090(3) 0.057(2) 0.046(2) -0.0279(17) 0.0314(18) -0.0351(19) 
C36 0.0203(11) 0.0252(12) 0.0183(11) -0.0027(10) 0.0015(9) -0.0019(10) 
C37 0.0210(12) 0.0215(11) 0.0283(13) 0.0065(10) 0.0025(10) -0.0011(9) 
C38 0.0236(12) 0.0261(12) 0.0270(13) 0.0032(10) 0.0013(10) -0.0007(10) 
C39 0.0313(14) 0.0233(12) 0.0395(16) 0.0006(11) 0.0005(11) -0.0026(11) 
C40 0.0331(14) 0.0271(13) 0.0411(16) 0.0125(12) 0.0033(12) -0.0025(11) 
C41 0.0296(14) 0.0355(14) 0.0272(14) 0.0085(11) 0.0069(11) 0.0006(11) 
C42 0.0245(13) 0.0253(12) 0.0300(14) 0.0021(10) 0.0045(10) 0.0019(10) 
C43 0.0477(17) 0.0341(14) 0.0316(15) -0.0014(12) 0.0070(13) 0.0049(13) 
C44 0.0365(15) 0.0379(15) 0.0303(15) -0.0006(12) 0.0037(11) -0.0033(12) 
 
_geom_special_details 
; 
 All esds (except the esd in the dihedral angle between two l.s. planes) 
 are estimated using the full covariance matrix.  The cell esds are taken 
 into account individually in the estimation of esds in distances, angles 
 and torsion angles; correlations between esds in cell parameters are only 
 used when they are defined by crystal symmetry.  An approximate (isotropic) 
 treatment of cell esds is used for estimating esds involving l.s. planes. 
; 
 
loop_ 
 _geom_bond_atom_site_label_1 
 _geom_bond_atom_site_label_2 
 _geom_bond_distance 
 _geom_bond_site_symmetry_2 
 _geom_bond_publ_flag 
Ir1 C36 1.895(2) . ? 
Ir1 C19 2.029(2) . ? 
Ir1 C28 2.237(2) . ? 
Ir1 C26 2.253(2) . ? 
Ir1 C27 2.257(2) . ? 
Ir1 C29 2.310(2) . ? 
Ir1 C30 2.319(2) . ? 
Ir1 P1 2.4082(6) . ? 
P1 C19 1.799(2) . ? 
P1 C1 1.877(2) . ? 
N1 C19 1.265(3) . ? 
N1 C20 1.424(3) . ? 
N2 C36 1.168(3) . ? 
N2 C37 1.396(3) . ? 
C1 C2 1.424(3) . ? 
C1 C6 1.436(3) . ? 
C2 C3 1.400(3) . ? 
C2 C7 1.555(3) . ? 
C3 C4 1.383(3) . ? 
C3 H3 0.9500 . ? 
C4 C5 1.393(3) . ? 
C4 C11 1.532(3) . ? 
C5 C6 1.399(3) . ? 
C5 H5 0.9500 . ? 
C6 C15 1.561(3) . ? 
C7 C10 1.527(3) . ? 
C7 C8 1.539(4) . ? 
C7 C9 1.553(4) . ? 
C8 H8A 0.9800 . ? 
C8 H8B 0.9800 . ? 
C8 H8C 0.9800 . ? 
C9 H9A 0.9800 . ? 
C9 H9B 0.9800 . ? 
C9 H9C 0.9800 . ? 
C10 H10A 0.9800 . ? 
C10 H10B 0.9800 . ? 
C10 H10C 0.9800 . ? 
C11 C13 1.520(4) . ? 
C11 C12 1.527(3) . ? 
C11 C14 1.539(4) . ? 
C12 H12A 0.9800 . ? 
C12 H12B 0.9800 . ? 
C12 H12C 0.9800 . ? 
C13 H13A 0.9800 . ? 
C13 H13B 0.9800 . ? 
C13 H13C 0.9800 . ? 
C14 H14A 0.9800 . ? 
C14 H14B 0.9800 . ? 
C14 H14C 0.9800 . ? 
C15 C16 1.521(4) . ? 
C15 C18 1.524(4) . ? 
C15 C17 1.536(4) . ? 
C16 H16A 0.9800 . ? 
C16 H16B 0.9800 . ? 
C16 H16C 0.9800 . ? 
C17 H17A 0.9800 . ? 
C17 H17B 0.9800 . ? 
C17 H17C 0.9800 . ? 
C18 H18A 0.9800 . ? 
C18 H18B 0.9800 . ? 
C18 H18C 0.9800 . ? 
C20 C25 1.393(3) . ? 
C20 C21 1.393(3) . ? 
C21 C22 1.389(4) . ? 
C21 H21 0.9500 . ? 
C22 C23 1.381(4) . ? 
C22 H22 0.9500 . ? 
C23 C24 1.387(4) . ? 
C23 H23 0.9500 . ? 
C24 C25 1.383(3) . ? 
C24 H24 0.9500 . ? 
C25 H25 0.9500 . ? 
C26 C27 1.423(4) . ? 
C26 C30 1.441(4) . ? 
C26 C31 1.505(4) . ? 
C27 C28 1.435(3) . ? 
C27 C32 1.501(4) . ? 
C28 C29 1.432(4) . ? 
C28 C33 1.500(4) . ? 
C29 C30 1.412(4) . ? 
C29 C34 1.501(4) . ? 
C30 C35 1.511(4) . ? 
C31 H31A 0.9800 . ? 
C31 H31B 0.9800 . ? 
C31 H31C 0.9800 . ? 
C32 H32A 0.9800 . ? 
C32 H32B 0.9800 . ? 
C32 H32C 0.9800 . ? 
C33 H33A 0.9800 . ? 
C33 H33B 0.9800 . ? 
C33 H33C 0.9800 . ? 
C34 H34A 0.9800 . ? 
C34 H34B 0.9800 . ? 
C34 H34C 0.9800 . ? 
C35 H35A 0.9800 . ? 
C35 H35B 0.9800 . ? 
C35 H35C 0.9800 . ? 
C37 C42 1.396(3) . ? 
C37 C38 1.402(3) . ? 
C38 C39 1.392(3) . ? 
C38 C44 1.503(3) . ? 
C39 C40 1.386(4) . ? 
C39 H39 0.9500 . ? 
C40 C41 1.380(4) . ? 
C40 H40 0.9500 . ? 
C41 C42 1.394(3) . ? 
C41 H41 0.9500 . ? 
C42 C43 1.503(3) . ? 
C43 H43A 0.9800 . ? 
C43 H43B 0.9800 . ? 
C43 H43C 0.9800 . ? 
C44 H44A 0.9800 . ? 
C44 H44B 0.9800 . ? 
C44 H44C 0.9800 . ? 
 
loop_ 
 _geom_angle_atom_site_label_1 
 _geom_angle_atom_site_label_2 
 _geom_angle_atom_site_label_3 
 _geom_angle 
 _geom_angle_site_symmetry_1 
 _geom_angle_site_symmetry_3 
 _geom_angle_publ_flag 
C36 Ir1 C19 90.46(9) . . ? 
C36 Ir1 C28 163.50(9) . . ? 
C19 Ir1 C28 98.96(9) . . ? 
C36 Ir1 C26 103.06(9) . . ? 
C19 Ir1 C26 143.08(10) . . ? 
C28 Ir1 C26 61.56(9) . . ? 
C36 Ir1 C27 126.67(9) . . ? 
C19 Ir1 C27 108.60(9) . . ? 
C28 Ir1 C27 37.25(9) . . ? 
C26 Ir1 C27 36.79(9) . . ? 
C36 Ir1 C29 143.13(10) . . ? 
C19 Ir1 C29 123.02(9) . . ? 
C28 Ir1 C29 36.67(9) . . ? 
C26 Ir1 C29 60.56(9) . . ? 
C27 Ir1 C29 61.15(9) . . ? 
C36 Ir1 C30 111.20(9) . . ? 
C19 Ir1 C30 158.16(9) . . ? 
C28 Ir1 C30 60.81(9) . . ? 
C26 Ir1 C30 36.72(10) . . ? 
C27 Ir1 C30 61.15(9) . . ? 
C29 Ir1 C30 35.53(9) . . ? 
C36 Ir1 P1 95.64(7) . . ? 
C19 Ir1 P1 46.89(7) . . ? 
C28 Ir1 P1 100.69(6) . . ? 
C26 Ir1 P1 157.80(7) . . ? 
C27 Ir1 P1 133.92(7) . . ? 
C29 Ir1 P1 97.26(7) . . ? 
C30 Ir1 P1 124.45(8) . . ? 
C19 P1 C1 106.29(10) . . ? 
C19 P1 Ir1 55.40(7) . . ? 
C1 P1 Ir1 114.63(7) . . ? 
C19 N1 C20 123.2(2) . . ? 
C36 N2 C37 175.9(2) . . ? 
C2 C1 C6 117.9(2) . . ? 
C2 C1 P1 121.52(17) . . ? 
C6 C1 P1 120.51(16) . . ? 
C3 C2 C1 118.0(2) . . ? 
C3 C2 C7 113.3(2) . . ? 
C1 C2 C7 128.5(2) . . ? 
C4 C3 C2 124.2(2) . . ? 
C4 C3 H3 117.9 . . ? 
C2 C3 H3 117.9 . . ? 
C3 C4 C5 116.0(2) . . ? 
C3 C4 C11 120.3(2) . . ? 
C5 C4 C11 123.1(2) . . ? 
C4 C5 C6 123.4(2) . . ? 
C4 C5 H5 118.3 . . ? 
C6 C5 H5 118.3 . . ? 
C5 C6 C1 118.1(2) . . ? 
C5 C6 C15 116.1(2) . . ? 
C1 C6 C15 125.6(2) . . ? 
C10 C7 C8 109.0(2) . . ? 
C10 C7 C9 105.0(2) . . ? 
C8 C7 C9 108.6(2) . . ? 
C10 C7 C2 116.3(2) . . ? 
C8 C7 C2 110.1(2) . . ? 
C9 C7 C2 107.4(2) . . ? 
C7 C8 H8A 109.5 . . ? 
C7 C8 H8B 109.5 . . ? 
H8A C8 H8B 109.5 . . ? 
C7 C8 H8C 109.5 . . ? 
H8A C8 H8C 109.5 . . ? 
H8B C8 H8C 109.5 . . ? 
C7 C9 H9A 109.5 . . ? 
C7 C9 H9B 109.5 . . ? 
H9A C9 H9B 109.5 . . ? 
C7 C9 H9C 109.5 . . ? 
H9A C9 H9C 109.5 . . ? 
H9B C9 H9C 109.5 . . ? 
C7 C10 H10A 109.5 . . ? 
C7 C10 H10B 109.5 . . ? 
H10A C10 H10B 109.5 . . ? 
C7 C10 H10C 109.5 . . ? 
H10A C10 H10C 109.5 . . ? 
H10B C10 H10C 109.5 . . ? 
C13 C11 C12 108.3(2) . . ? 
C13 C11 C4 112.5(2) . . ? 
C12 C11 C4 111.3(2) . . ? 
C13 C11 C14 108.8(2) . . ? 
C12 C11 C14 108.7(2) . . ? 
C4 C11 C14 107.2(2) . . ? 
C11 C12 H12A 109.5 . . ? 
C11 C12 H12B 109.5 . . ? 
H12A C12 H12B 109.5 . . ? 
C11 C12 H12C 109.5 . . ? 
H12A C12 H12C 109.5 . . ? 
H12B C12 H12C 109.5 . . ? 
C11 C13 H13A 109.5 . . ? 
C11 C13 H13B 109.5 . . ? 
H13A C13 H13B 109.5 . . ? 
C11 C13 H13C 109.5 . . ? 
H13A C13 H13C 109.5 . . ? 
H13B C13 H13C 109.5 . . ? 
C11 C14 H14A 109.5 . . ? 
C11 C14 H14B 109.5 . . ? 
H14A C14 H14B 109.5 . . ? 
C11 C14 H14C 109.5 . . ? 
H14A C14 H14C 109.5 . . ? 
H14B C14 H14C 109.5 . . ? 
C16 C15 C18 111.6(3) . . ? 
C16 C15 C17 106.3(2) . . ? 
C18 C15 C17 104.2(2) . . ? 
C16 C15 C6 111.8(2) . . ? 
C18 C15 C6 111.8(2) . . ? 
C17 C15 C6 110.78(19) . . ? 
C15 C16 H16A 109.5 . . ? 
C15 C16 H16B 109.5 . . ? 
H16A C16 H16B 109.5 . . ? 
C15 C16 H16C 109.5 . . ? 
H16A C16 H16C 109.5 . . ? 
H16B C16 H16C 109.5 . . ? 
C15 C17 H17A 109.5 . . ? 
C15 C17 H17B 109.5 . . ? 
H17A C17 H17B 109.5 . . ? 
C15 C17 H17C 109.5 . . ? 
H17A C17 H17C 109.5 . . ? 
H17B C17 H17C 109.5 . . ? 
C15 C18 H18A 109.5 . . ? 
C15 C18 H18B 109.5 . . ? 
H18A C18 H18B 109.5 . . ? 
C15 C18 H18C 109.5 . . ? 
H18A C18 H18C 109.5 . . ? 
H18B C18 H18C 109.5 . . ? 
N1 C19 P1 138.36(19) . . ? 
N1 C19 Ir1 142.40(18) . . ? 
P1 C19 Ir1 77.71(9) . . ? 
C25 C20 C21 118.9(2) . . ? 
C25 C20 N1 123.5(2) . . ? 
C21 C20 N1 117.5(2) . . ? 
C22 C21 C20 120.4(3) . . ? 
C22 C21 H21 119.8 . . ? 
C20 C21 H21 119.8 . . ? 
C23 C22 C21 120.5(3) . . ? 
C23 C22 H22 119.8 . . ? 
C21 C22 H22 119.8 . . ? 
C22 C23 C24 119.1(2) . . ? 
C22 C23 H23 120.4 . . ? 
C24 C23 H23 120.4 . . ? 
C25 C24 C23 121.0(2) . . ? 
C25 C24 H24 119.5 . . ? 
C23 C24 H24 119.5 . . ? 
C24 C25 C20 120.1(2) . . ? 
C24 C25 H25 120.0 . . ? 
C20 C25 H25 120.0 . . ? 
C27 C26 C30 108.7(2) . . ? 
C27 C26 C31 125.6(3) . . ? 
C30 C26 C31 125.2(3) . . ? 
C27 C26 Ir1 71.78(14) . . ? 
C30 C26 Ir1 74.12(14) . . ? 
C31 C26 Ir1 126.21(18) . . ? 
C26 C27 C28 107.0(2) . . ? 
C26 C27 C32 126.1(3) . . ? 
C28 C27 C32 126.6(3) . . ? 
C26 C27 Ir1 71.44(13) . . ? 
C28 C27 Ir1 70.60(13) . . ? 
C32 C27 Ir1 127.94(17) . . ? 
C29 C28 C27 108.3(2) . . ? 
C29 C28 C33 125.1(2) . . ? 
C27 C28 C33 126.3(3) . . ? 
C29 C28 Ir1 74.46(13) . . ? 
C27 C28 Ir1 72.15(13) . . ? 
C33 C28 Ir1 124.21(17) . . ? 
C30 C29 C28 108.4(2) . . ? 
C30 C29 C34 127.2(3) . . ? 
C28 C29 C34 124.3(3) . . ? 
C30 C29 Ir1 72.56(14) . . ? 
C28 C29 Ir1 68.87(13) . . ? 
C34 C29 Ir1 126.03(18) . . ? 
C29 C30 C26 107.5(2) . . ? 
C29 C30 C35 127.1(3) . . ? 
C26 C30 C35 125.1(3) . . ? 
C29 C30 Ir1 71.91(14) . . ? 
C26 C30 Ir1 69.16(14) . . ? 
C35 C30 Ir1 129.30(18) . . ? 
C26 C31 H31A 109.5 . . ? 
C26 C31 H31B 109.5 . . ? 
H31A C31 H31B 109.5 . . ? 
C26 C31 H31C 109.5 . . ? 
H31A C31 H31C 109.5 . . ? 
H31B C31 H31C 109.5 . . ? 
C27 C32 H32A 109.5 . . ? 
C27 C32 H32B 109.5 . . ? 
H32A C32 H32B 109.5 . . ? 
C27 C32 H32C 109.5 . . ? 
H32A C32 H32C 109.5 . . ? 
H32B C32 H32C 109.5 . . ? 
C28 C33 H33A 109.5 . . ? 
C28 C33 H33B 109.5 . . ? 
H33A C33 H33B 109.5 . . ? 
C28 C33 H33C 109.5 . . ? 
H33A C33 H33C 109.5 . . ? 
H33B C33 H33C 109.5 . . ? 
C29 C34 H34A 109.5 . . ? 
C29 C34 H34B 109.5 . . ? 
H34A C34 H34B 109.5 . . ? 
C29 C34 H34C 109.5 . . ? 
H34A C34 H34C 109.5 . . ? 
H34B C34 H34C 109.5 . . ? 
C30 C35 H35A 109.5 . . ? 
C30 C35 H35B 109.5 . . ? 
H35A C35 H35B 109.5 . . ? 
C30 C35 H35C 109.5 . . ? 
H35A C35 H35C 109.5 . . ? 
H35B C35 H35C 109.5 . . ? 
N2 C36 Ir1 178.3(2) . . ? 
C42 C37 N2 118.9(2) . . ? 
C42 C37 C38 123.1(2) . . ? 
N2 C37 C38 118.0(2) . . ? 
C39 C38 C37 117.0(2) . . ? 
C39 C38 C44 122.4(2) . . ? 
C37 C38 C44 120.7(2) . . ? 
C40 C39 C38 121.3(2) . . ? 
C40 C39 H39 119.4 . . ? 
C38 C39 H39 119.4 . . ? 
C41 C40 C39 120.2(2) . . ? 
C41 C40 H40 119.9 . . ? 
C39 C40 H40 119.9 . . ? 
C40 C41 C42 121.0(2) . . ? 
C40 C41 H41 119.5 . . ? 
C42 C41 H41 119.5 . . ? 
C41 C42 C37 117.4(2) . . ? 
C41 C42 C43 121.1(2) . . ? 
C37 C42 C43 121.5(2) . . ? 
C42 C43 H43A 109.5 . . ? 
C42 C43 H43B 109.5 . . ? 
H43A C43 H43B 109.5 . . ? 
C42 C43 H43C 109.5 . . ? 
H43A C43 H43C 109.5 . . ? 
H43B C43 H43C 109.5 . . ? 
C38 C44 H44A 109.5 . . ? 
C38 C44 H44B 109.5 . . ? 
H44A C44 H44B 109.5 . . ? 
C38 C44 H44C 109.5 . . ? 
H44A C44 H44C 109.5 . . ? 
H44B C44 H44C 109.5 . . ? 
 
loop_ 
 _geom_torsion_atom_site_label_1 
 _geom_torsion_atom_site_label_2 
 _geom_torsion_atom_site_label_3 
 _geom_torsion_atom_site_label_4 
 _geom_torsion 
 _geom_torsion_site_symmetry_1 
 _geom_torsion_site_symmetry_2 
 _geom_torsion_site_symmetry_3 
 _geom_torsion_site_symmetry_4 
 _geom_torsion_publ_flag 
C36 Ir1 P1 C19 85.33(11) . . . . ? 
C28 Ir1 P1 C19 -92.31(11) . . . . ? 
C26 Ir1 P1 C19 -127.2(2) . . . . ? 
C27 Ir1 P1 C19 -72.84(12) . . . . ? 
C29 Ir1 P1 C19 -129.29(11) . . . . ? 
C30 Ir1 P1 C19 -154.11(12) . . . . ? 
C36 Ir1 P1 C1 -8.03(11) . . . . ? 
C19 Ir1 P1 C1 -93.36(12) . . . . ? 
C28 Ir1 P1 C1 174.33(10) . . . . ? 
C26 Ir1 P1 C1 139.5(2) . . . . ? 
C27 Ir1 P1 C1 -166.20(12) . . . . ? 
C29 Ir1 P1 C1 137.35(11) . . . . ? 
C30 Ir1 P1 C1 112.53(11) . . . . ? 
C19 P1 C1 C2 53.6(2) . . . . ? 
Ir1 P1 C1 C2 112.50(17) . . . . ? 
C19 P1 C1 C6 -124.16(18) . . . . ? 
Ir1 P1 C1 C6 -65.27(19) . . . . ? 
C6 C1 C2 C3 15.6(3) . . . . ? 
P1 C1 C2 C3 -162.19(17) . . . . ? 
C6 C1 C2 C7 -158.5(2) . . . . ? 
P1 C1 C2 C7 23.7(3) . . . . ? 
C1 C2 C3 C4 -3.6(4) . . . . ? 
C7 C2 C3 C4 171.4(2) . . . . ? 
C2 C3 C4 C5 -7.3(4) . . . . ? 
C2 C3 C4 C11 -178.4(2) . . . . ? 
C3 C4 C5 C6 6.1(3) . . . . ? 
C11 C4 C5 C6 176.9(2) . . . . ? 
C4 C5 C6 C1 5.8(3) . . . . ? 
C4 C5 C6 C15 -169.3(2) . . . . ? 
C2 C1 C6 C5 -16.7(3) . . . . ? 
P1 C1 C6 C5 161.14(17) . . . . ? 
C2 C1 C6 C15 157.9(2) . . . . ? 
P1 C1 C6 C15 -24.2(3) . . . . ? 
C3 C2 C7 C10 -168.6(2) . . . . ? 
C1 C2 C7 C10 5.7(4) . . . . ? 
C3 C2 C7 C8 66.7(3) . . . . ? 
C1 C2 C7 C8 -118.9(3) . . . . ? 
C3 C2 C7 C9 -51.3(3) . . . . ? 
C1 C2 C7 C9 123.0(3) . . . . ? 
C3 C4 C11 C13 -165.0(2) . . . . ? 
C5 C4 C11 C13 24.6(3) . . . . ? 
C3 C4 C11 C12 -43.3(3) . . . . ? 
C5 C4 C11 C12 146.3(2) . . . . ? 
C3 C4 C11 C14 75.4(3) . . . . ? 
C5 C4 C11 C14 -95.0(3) . . . . ? 
C5 C6 C15 C16 -91.2(3) . . . . ? 
C1 C6 C15 C16 94.1(3) . . . . ? 
C5 C6 C15 C18 142.9(3) . . . . ? 
C1 C6 C15 C18 -31.8(3) . . . . ? 
C5 C6 C15 C17 27.2(3) . . . . ? 
C1 C6 C15 C17 -147.5(2) . . . . ? 
C20 N1 C19 P1 -172.3(2) . . . . ? 
C20 N1 C19 Ir1 -13.0(4) . . . . ? 
C1 P1 C19 N1 -83.7(3) . . . . ? 
Ir1 P1 C19 N1 167.3(3) . . . . ? 
C1 P1 C19 Ir1 109.02(9) . . . . ? 
C36 Ir1 C19 N1 96.6(3) . . . . ? 
C28 Ir1 C19 N1 -69.8(3) . . . . ? 
C26 Ir1 C19 N1 -16.2(4) . . . . ? 
C27 Ir1 C19 N1 -32.7(3) . . . . ? 
C29 Ir1 C19 N1 -99.8(3) . . . . ? 
C30 Ir1 C19 N1 -90.7(4) . . . . ? 
P1 Ir1 C19 N1 -166.1(3) . . . . ? 
C36 Ir1 C19 P1 -97.30(9) . . . . ? 
C28 Ir1 C19 P1 96.30(9) . . . . ? 
C26 Ir1 C19 P1 149.93(12) . . . . ? 
C27 Ir1 C19 P1 133.43(8) . . . . ? 
C29 Ir1 C19 P1 66.30(11) . . . . ? 
C30 Ir1 C19 P1 75.4(3) . . . . ? 
C19 N1 C20 C25 -45.2(3) . . . . ? 
C19 N1 C20 C21 138.2(3) . . . . ? 
C25 C20 C21 C22 2.5(4) . . . . ? 
N1 C20 C21 C22 179.2(2) . . . . ? 
C20 C21 C22 C23 -1.6(4) . . . . ? 
C21 C22 C23 C24 -0.1(4) . . . . ? 
C22 C23 C24 C25 0.8(4) . . . . ? 
C23 C24 C25 C20 0.1(4) . . . . ? 
C21 C20 C25 C24 -1.8(4) . . . . ? 
N1 C20 C25 C24 -178.2(2) . . . . ? 
C36 Ir1 C26 C27 -135.52(15) . . . . ? 
C19 Ir1 C26 C27 -26.7(2) . . . . ? 
C28 Ir1 C26 C27 38.06(14) . . . . ? 
C29 Ir1 C26 C27 80.18(16) . . . . ? 
C30 Ir1 C26 C27 116.4(2) . . . . ? 
P1 Ir1 C26 C27 77.8(3) . . . . ? 
C36 Ir1 C26 C30 108.04(16) . . . . ? 
C19 Ir1 C26 C30 -143.14(17) . . . . ? 
C28 Ir1 C26 C30 -78.37(16) . . . . ? 
C27 Ir1 C26 C30 -116.4(2) . . . . ? 
C29 Ir1 C26 C30 -36.25(15) . . . . ? 
P1 Ir1 C26 C30 -38.6(3) . . . . ? 
C36 Ir1 C26 C31 -14.3(3) . . . . ? 
C19 Ir1 C26 C31 94.6(3) . . . . ? 
C28 Ir1 C26 C31 159.3(3) . . . . ? 
C27 Ir1 C26 C31 121.3(4) . . . . ? 
C29 Ir1 C26 C31 -158.6(3) . . . . ? 
C30 Ir1 C26 C31 -122.3(4) . . . . ? 
P1 Ir1 C26 C31 -160.9(2) . . . . ? 
C30 C26 C27 C28 3.4(3) . . . . ? 
C31 C26 C27 C28 176.0(2) . . . . ? 
Ir1 C26 C27 C28 -62.04(16) . . . . ? 
C30 C26 C27 C32 -170.7(2) . . . . ? 
C31 C26 C27 C32 2.0(4) . . . . ? 
Ir1 C26 C27 C32 123.9(2) . . . . ? 
C30 C26 C27 Ir1 65.43(16) . . . . ? 
C31 C26 C27 Ir1 -121.9(2) . . . . ? 
C36 Ir1 C27 C26 58.31(18) . . . . ? 
C19 Ir1 C27 C26 163.45(15) . . . . ? 
C28 Ir1 C27 C26 -116.4(2) . . . . ? 
C29 Ir1 C27 C26 -78.45(16) . . . . ? 
C30 Ir1 C27 C26 -37.68(15) . . . . ? 
P1 Ir1 C27 C26 -149.16(12) . . . . ? 
C36 Ir1 C27 C28 174.72(14) . . . . ? 
C19 Ir1 C27 C28 -80.14(16) . . . . ? 
C26 Ir1 C27 C28 116.4(2) . . . . ? 
C29 Ir1 C27 C28 37.96(15) . . . . ? 
C30 Ir1 C27 C28 78.73(16) . . . . ? 
P1 Ir1 C27 C28 -32.75(19) . . . . ? 
C36 Ir1 C27 C32 -63.5(3) . . . . ? 
C19 Ir1 C27 C32 41.6(3) . . . . ? 
C28 Ir1 C27 C32 121.8(3) . . . . ? 
C26 Ir1 C27 C32 -121.8(3) . . . . ? 
C29 Ir1 C27 C32 159.7(3) . . . . ? 
C30 Ir1 C27 C32 -159.5(3) . . . . ? 
P1 Ir1 C27 C32 89.0(3) . . . . ? 
C26 C27 C28 C29 -3.7(3) . . . . ? 
C32 C27 C28 C29 170.4(2) . . . . ? 
Ir1 C27 C28 C29 -66.25(16) . . . . ? 
C26 C27 C28 C33 -177.7(2) . . . . ? 
C32 C27 C28 C33 -3.6(4) . . . . ? 
Ir1 C27 C28 C33 119.8(2) . . . . ? 
C26 C27 C28 Ir1 62.59(16) . . . . ? 
C32 C27 C28 Ir1 -123.4(2) . . . . ? 
C36 Ir1 C28 C29 100.5(4) . . . . ? 
C19 Ir1 C28 C29 -135.40(15) . . . . ? 
C26 Ir1 C28 C29 77.97(17) . . . . ? 
C27 Ir1 C28 C29 115.6(2) . . . . ? 
C30 Ir1 C28 C29 35.84(15) . . . . ? 
P1 Ir1 C28 C29 -87.80(14) . . . . ? 
C36 Ir1 C28 C27 -15.1(4) . . . . ? 
C19 Ir1 C28 C27 109.04(16) . . . . ? 
C26 Ir1 C28 C27 -37.59(15) . . . . ? 
C29 Ir1 C28 C27 -115.6(2) . . . . ? 
C30 Ir1 C28 C27 -79.72(16) . . . . ? 
P1 Ir1 C28 C27 156.64(14) . . . . ? 
C36 Ir1 C28 C33 -137.3(3) . . . . ? 
C19 Ir1 C28 C33 -13.2(2) . . . . ? 
C26 Ir1 C28 C33 -159.8(3) . . . . ? 
C27 Ir1 C28 C33 -122.2(3) . . . . ? 
C29 Ir1 C28 C33 122.2(3) . . . . ? 
C30 Ir1 C28 C33 158.1(3) . . . . ? 
P1 Ir1 C28 C33 34.4(2) . . . . ? 
C27 C28 C29 C30 2.6(3) . . . . ? 
C33 C28 C29 C30 176.6(2) . . . . ? 
Ir1 C28 C29 C30 -62.17(17) . . . . ? 
C27 C28 C29 C34 -175.3(2) . . . . ? 
C33 C28 C29 C34 -1.2(4) . . . . ? 
Ir1 C28 C29 C34 120.0(2) . . . . ? 
C27 C28 C29 Ir1 64.73(15) . . . . ? 
C33 C28 C29 Ir1 -121.2(2) . . . . ? 
C36 Ir1 C29 C30 -33.9(2) . . . . ? 
C19 Ir1 C29 C30 174.21(15) . . . . ? 
C28 Ir1 C29 C30 118.4(2) . . . . ? 
C26 Ir1 C29 C30 37.48(16) . . . . ? 
C27 Ir1 C29 C30 79.83(17) . . . . ? 
P1 Ir1 C29 C30 -143.43(14) . . . . ? 
C36 Ir1 C29 C28 -152.27(16) . . . . ? 
C19 Ir1 C29 C28 55.81(18) . . . . ? 
C26 Ir1 C29 C28 -80.92(16) . . . . ? 
C27 Ir1 C29 C28 -38.57(15) . . . . ? 
C30 Ir1 C29 C28 -118.4(2) . . . . ? 
P1 Ir1 C29 C28 98.17(14) . . . . ? 
C36 Ir1 C29 C34 89.9(3) . . . . ? 
C19 Ir1 C29 C34 -62.0(3) . . . . ? 
C28 Ir1 C29 C34 -117.8(3) . . . . ? 
C26 Ir1 C29 C34 161.3(3) . . . . ? 
C27 Ir1 C29 C34 -156.4(3) . . . . ? 
C30 Ir1 C29 C34 123.8(3) . . . . ? 
P1 Ir1 C29 C34 -19.7(3) . . . . ? 
C28 C29 C30 C26 -0.5(3) . . . . ? 
C34 C29 C30 C26 177.3(2) . . . . ? 
Ir1 C29 C30 C26 -60.29(16) . . . . ? 
C28 C29 C30 C35 -174.1(2) . . . . ? 
C34 C29 C30 C35 3.6(4) . . . . ? 
Ir1 C29 C30 C35 126.0(3) . . . . ? 
C28 C29 C30 Ir1 59.84(16) . . . . ? 
C34 C29 C30 Ir1 -122.4(3) . . . . ? 
C27 C26 C30 C29 -1.9(3) . . . . ? 
C31 C26 C30 C29 -174.5(2) . . . . ? 
Ir1 C26 C30 C29 62.06(17) . . . . ? 
C27 C26 C30 C35 172.0(2) . . . . ? 
C31 C26 C30 C35 -0.7(4) . . . . ? 
Ir1 C26 C30 C35 -124.1(2) . . . . ? 
C27 C26 C30 Ir1 -63.91(16) . . . . ? 
C31 C26 C30 Ir1 123.4(2) . . . . ? 
C36 Ir1 C30 C29 158.98(15) . . . . ? 
C19 Ir1 C30 C29 -13.1(3) . . . . ? 
C28 Ir1 C30 C29 -36.99(15) . . . . ? 
C26 Ir1 C30 C29 -117.6(2) . . . . ? 
C27 Ir1 C30 C29 -79.84(16) . . . . ? 
P1 Ir1 C30 C29 45.79(17) . . . . ? 
C36 Ir1 C30 C26 -83.43(16) . . . . ? 
C19 Ir1 C30 C26 104.4(3) . . . . ? 
C28 Ir1 C30 C26 80.59(16) . . . . ? 
C27 Ir1 C30 C26 37.75(14) . . . . ? 
C29 Ir1 C30 C26 117.6(2) . . . . ? 
P1 Ir1 C30 C26 163.38(12) . . . . ? 
C36 Ir1 C30 C35 35.4(3) . . . . ? 
C19 Ir1 C30 C35 -136.7(3) . . . . ? 
C28 Ir1 C30 C35 -160.5(3) . . . . ? 
C26 Ir1 C30 C35 118.9(4) . . . . ? 
C27 Ir1 C30 C35 156.6(3) . . . . ? 
C29 Ir1 C30 C35 -123.5(4) . . . . ? 
P1 Ir1 C30 C35 -77.8(3) . . . . ? 
C42 C37 C38 C39 -1.2(4) . . . . ? 
N2 C37 C38 C39 179.8(2) . . . . ? 
C42 C37 C38 C44 177.9(2) . . . . ? 
N2 C37 C38 C44 -1.1(3) . . . . ? 
C37 C38 C39 C40 0.6(4) . . . . ? 
C44 C38 C39 C40 -178.5(2) . . . . ? 
C38 C39 C40 C41 0.2(4) . . . . ? 
C39 C40 C41 C42 -0.5(4) . . . . ? 
C40 C41 C42 C37 0.0(4) . . . . ? 
C40 C41 C42 C43 178.6(2) . . . . ? 
N2 C37 C42 C41 180.0(2) . . . . ? 
C38 C37 C42 C41 0.9(4) . . . . ? 
N2 C37 C42 C43 1.4(3) . . . . ? 
C38 C37 C42 C43 -177.7(2) . . . . ? 
 
_diffrn_measured_fraction_theta_max    0.998 
_diffrn_reflns_theta_full              27.48 
_diffrn_measured_fraction_theta_full   0.998 
_refine_diff_density_max    0.985 
_refine_diff_density_min   -0.555 
_refine_diff_density_rms    0.075 


#===END
